# 1 **Mesoscale Dynamics of Spectrin and Acto-Myosin shape Membrane** 2 **Territories during Mechanoresponse**

3 Andrea Ghisleni<sup>1\*§</sup>, Camilla Galli<sup>1\*</sup>, Pascale Monzo<sup>1</sup>, Flora Ascione<sup>1</sup>, Marc-Antoine  
4 Fardin<sup>2</sup>, Giorgio Scita<sup>1</sup>, Qingsen Li<sup>1</sup>, Paolo Maiuri<sup>1</sup>, Nils Gauthier<sup>1§</sup>

5 <sup>1</sup> Institute FIRC of Molecular Oncology (IFOM), Via Adamello 16, 20139 Milan, Italy

6 <sup>2</sup> Institut Jacques Monod, Centre National de la Recherche Scientifique UMR 7592 and Université Paris  
7 Diderot, 75013 Paris, France.

8 \* These authors contributed equally

9 <sup>§</sup> Corresponding authors: [andrea.ghisleni@ifom.eu](mailto:andrea.ghisleni@ifom.eu) and [nils.gauthier@ifom.eu](mailto:nils.gauthier@ifom.eu)

10

## 11 **Abstract**

12 The spectrin cytoskeleton is a major component of the cell cortex. While ubiquitously expressed, its  
13 dynamic interaction with the other cortex components, including the plasma membrane or the acto-myosin  
14 cytoskeleton, is poorly understood. Here, we investigated how the spectrin cytoskeleton re-organizes  
15 spatially and dynamically under the membrane during changes in cell mechanics. We found spectrin and  
16 acto-myosin cytoskeletons to be spatially distinct but cooperating during mechanical challenges, such as  
17 cell adhesion and contraction, or compression, stretch and osmolarity fluctuations, creating a cohesive  
18 cortex supporting the plasma membrane. Actin territories control protrusions and contractile structures  
19 while spectrin territories concentrate in retractile zones and low-actin density/inter-contractile regions,  
20 acting as a fence to organize membrane trafficking events. We unveil here the existence of a dynamic  
21 interplay between acto-myosin and spectrin cytoskeletons necessary to support a mesoscale organization  
22 of the lipid bilayer into spatially-confined cortical territories during cell mechanoresponse.

23

## 24 **Introduction**

25 Eukaryotic cells have developed several mechanisms to control their shape, sense their surroundings  
26 and adapt to external cues. While a lot of efforts have been devoted to the study of the acto-myosin and  
27 microtubule cytoskeletons, our understanding of cytoskeletal scaffolds directly connected to the plasma  
28 membrane (PM) lags behind. These systems are expected to play crucial roles in many cellular  
29 mechanoadaptive processes by shaping PM topology in association with the underlying cell cortex. Such  
30 processes have been investigated at nanoscale resolution through electron microscopy or advance light  
31 microscopy, and their nanoscale dynamics has just begun to be revealed by a handful of high-end  
32 microscopy techniques including fluorescence life-time, Förster resonance energy transfer, or fluorescence  
33 correlation spectroscopy (Kalappurakkal *et al.*, 2019; Saka *et al.*, 2014; Chugh *et al.*, 2017). However, the  
34 mesoscale architectural organization and dynamics of the PM-cortex association are far less understood. In  
35 particular, we lack a detailed description of the behavior of the scaffold molecules that are part of the  
36 composite material constituted by the PM-cortex during changes in cell shape and mechanics.

37 A key component of this PM-cortex composite material is spectrin. This ubiquitous protein is able to  
38 assemble into a non-polarized meshwork connected to the PM, the actin cytoskeleton and their associated  
39 proteins (Bennett and Lorenzo, 2016; Machnicka *et al.*, 2012). In mammals, 7 different spectrin isogenes  
40 encode for 2  $\alpha$  and 5  $\beta$  subunits, which can be alternatively spliced into different isoforms. Among them,  
41  $\alpha$ II- and  $\beta$ II-spectrins are the most expressed in solid tissues (Machnicka *et al.*, 2014; Bennett and Healy,  
42 2009), whereas  $\alpha$ I and  $\beta$ I-spectrin expression is restricted to circulating erythrocytes. Among all the spectrin  
43 isogenes,  $\alpha$ II/ $\beta$ II-spectrins and  $\alpha$ I/ $\beta$ I-spectrin mainly associate with the plasma membrane. At the protein  
44 level, spectrin exists as an elongated head-to-tail  $\alpha/\beta$  heterodimer juxtaposed to a homologous molecule  
45 via tetramerization domains. This spectrin tetramer retains at both ends two actin-binding domains  
46 specifically harbored by the two N-termini of  $\beta$ -spectrin, while several PM binding domains are present  
47 along with both  $\alpha$  and  $\beta$  subunits. These bonds are the key elements for anchoring the spectrin meshwork  
48 to the actin cytoskeleton and the inner leaflet of the lipid bilayer (Baines, 2009). The spectrin skeleton has  
49 been implicated in many processes, including the stability and organization of PM, signal transduction

50 processes, and membrane trafficking via endo and exocytic pathways (Jenkins, He and Bennett, 2015). In  
51 accordance with its broad range of physiological functions,  $\alpha$ - and  $\beta$ -spectrin genes have been found to  
52 be essential in embryonic development (Tang *et al.*, 2003; Stankewich *et al.*, 2011) and are also involved in  
53 many pathological conditions such as hemolytic diseases, developmental defects, cancer, channelopathies,  
54 neuropathies and cardiac defects (Lecomte, 2012).

55 Despite this wealth of knowledge, our understanding of spectrin macromolecular organization is  
56 limited to the study of *ex-vivo* erythrocytes and neurons, where it forms a triangular-like lattice and a  
57 repetitive barrel-like array interspaced by actin nodes, respectively (Liu, Derick and Palek, 1987; Byers and  
58 Branton, 1985; Pan *et al.*, 2018; Xu, Zhong and Zhuang, 2013). Interestingly, erythrocytes do not possess  
59 actin filaments at their cortex. They can only polymerize short actin protofilaments made of 13 to 15 G-  
60 actin monomers ( $\approx 33 \pm 5$  nm in length) that specifically serve to crosslink multiple spectrin rods, which act as  
61 the exclusive PM supportive scaffold (Ursitti and Fowler, 1994). Several attempts to describe the spectrin  
62 meshwork organization at high resolution have been reported by different electron and fluorescence light  
63 microscopy techniques. The reported lengths of the spectrin tetramer range from 50 to 200 nm, depending  
64 on erythroid or neuronal lineage and sample preparation protocols (Xu, Zhong and Zhuang, 2013; Pan *et al.*,  
65 2018; Hauser *et al.*, 2018). To reconcile these disparate observations, a working model has been proposed  
66 whereby spectrin mesh can stretch and relax at maximum contour length upon mechanical perturbation to  
67 preserve PM integrity and to maintain cell shape (Machnicka *et al.*, 2012). The elasticity of the meshwork is  
68 ensured at the molecular level by the intrinsic flexibility of the so-called “spectrin repeats”, triple-helix  
69 bundles that can unfold upon mechanical perturbations (Djinovic-Carugo *et al.*, 2002; Law *et al.*, 2003).

70 Its role in supporting the plasma membrane makes of spectrin a major player in cell  
71 mechanoprotection mechanisms. Recent studies in red blood cell showed that spectrin is critical in  
72 preserving cell shape by working in conjunction with myosin-dependent contractility (Smith *et al.*, 2018).  
73 Whereas, in *C. elegans* neurons, spectrin protects axons from mechanical tension and deformation, in  
74 conjunction with the microtubules (Krieg *et al.*, 2017). In the same model organism, spectrin and actin  
75 polymerization deficiencies have been shown to impair body axis elongation, supporting a cooperative

76 mechanoprotective mechanism of the two cytoskeletons at the tissue scale (Lardennois *et al.*, 2019).  $\beta$ II-  
77 spectrin has also been involved in the maintenance of epithelial cell-cell contact through microtubule-  
78 dependent processes, and its dynamics was shown to inversely correlate with endocytic capacities (Jenkins,  
79 He and Bennett, 2015). A mechanoresponsive role during myoblasts fusion in muscle development has  
80 recently been proposed for the  $\alpha$ II/ $\beta$ V-spectrin dimer (Duan *et al.*, 2018). This developmental process is  
81 conserved among different species (e.g. drosophila and mammalian cells), lending support to the possibility  
82 that the more ubiquitously expressed  $\alpha$ II/ $\beta$ II-spectrin plays a more general and widespread role in  
83 mechanoresponsive processes.

84 Here, we used a wide range of mechanobiology techniques to comprehensively analyze  $\beta$ II-spectrin  
85 behavior during cell mechanoresponse. We found that spectrin is a major dynamic component for shaping  
86 the mesoscale-topological organization of the cell cortex upon mechanical stimuli. Specifically, spectrin  
87 complements cortical actin distribution and dynamics, while the cooperation between the two  
88 cytoskeletons ensures membrane stability during mechanical challenges, ultimately preserving cell  
89 integrity. We also unveiled a fundamental role for myosin-driven contractility in the regulation of spectrin  
90 dynamics, and how the orchestrated interplay between spectrin and PM might complement the actin-  
91 driven “pickets and fencing” mechanism in regulating membrane trafficking events, such as clathrin-  
92 mediated endocytosis.

93

## 94 **Results**

### 95 **Spectrin and Actin define distinct but complementary plasma membrane territories in cells of different** 96 **origins**

97 Spectrin has been shown to adopt different configurations in erythrocytes and neuronal axons (Xu,  
98 Zhong and Zhuang, 2013; Fowler, 2013), while the organization in other cell types is far less accurately  
99 depicted. To fill this gap, we examined the spectrin-actin supramolecular organization in a variety of  
100 mammalian cells. We focused on  $\beta$ II-spectrin, the most abundant isoform among the  $\beta$  subunits in  
101 nucleated mammalian cells (Thul *et al.*, 2017) (Figure S1 B). In mouse embryonic fibroblasts (MEFs), the two  
102 endogenous subunits ( $\alpha$ II and  $\beta$ II) showed, as expected, a perfect co-localization by total internal reflection  
103 microscopy (TIRFM) (Figure S1 A). On the contrary, endogenous  $\beta$ II-spectrin and actin displayed a  
104 remarkable complementary pattern, which was particularly prominent along the actin stress fibers that  
105 were devoid of  $\beta$ II-spectrin (Figure 1 A-C). This peculiar arrangement was conserved in many other cell  
106 types, primary or immortalized, of human and murine origin, derived either from normal or pathological  
107 tissues at whole-cell (Figure S1 D), but particularly on the region adjacent to the basal PM using TIRFM  
108 (Figure S1 D and zooms in Figure S2). Specifically,  $\beta$ II-spectrin formed a mesh-like pattern that filled the  
109 gaps between actin cables and was completely excluded from actin-rich leading-edge structures such as  
110 lamellipodia and filopodia (Figure S2). Overall, we identified four subcellular regions of complementarity in  
111 all cell lines tested: leading-edge, stress fiber-enriched cortex, actin- or spectrin-rich membrane curvatures  
112 (Figure 1 A and Figure S2). Interestingly, actin-depleted membrane curvatures were highly enriched in  
113 spectrin and *vice versa*, suggesting that the two scaffolds might aid in shaping negatively curved PM  
114 regions.

115 The complementary pattern observed between spectrin and actin in cells seeded on a continuous  
116 adhesive substrate may not reflect the cortical organization of non-adhesive zones, such as on the apical  
117 part of the cell. To address this limitation, we applied microcontact printing techniques to create  
118 fibronectin-coated patterns separated by non-adhesive surface and use the resolving power of TIRFM over  
119 non-adherent membrane patches (i.e. free-standing “cortex-mimicry” zones, Figure 1 B). Also under these

120 conditions, spectrin and actin did not colocalize, and displayed a complementary pattern at stress fiber-  
121 enriched cortex and on membrane curvatures (Figure 1 B and crossbows in C). Furthermore, by imposing  
122 different shapes to the cells from non-polarized (circle, stress fiber-poor) to polarized ones (long crossbow,  
123 stress fiber-rich), we confirmed the exclusion of spectrin from leading-edge-like zones. Finally, this  
124 distinctive distribution of spectrin and actin was also observed in fixed cells using fluorescently-tagged GFP-  
125  $\beta$ II-spectrin (Figure 1 C).

## 126 **Spectrin forms a continuous dynamic meshwork of variable density during cell-driven mechanoresponses**

127 Fibroblasts spreading can be considered as a stereotypical model to study *de novo* cytoskeletal  
128 assembly and cell-driven mechanoresponse (Figure 2 A) (Iskratsch, Wolfenson and Sheetz, 2014; Gauthier  
129 *et al.*, 2009). Naïve suspended cells rapidly spread over matrix-coated substrates (fibronectin-coated glass  
130 coverslip in this work) through a multi-phasic process characterized by the initial cell attachment (P0)  
131 followed by the isotropic expansion of the cell area (P1). This expansion is propelled at the leading-edge by  
132 Arp2/3-dependent actin polymerization. After a short transition (T) driven by a change in the PM tension,  
133 the activation of myosin contractility and membrane trafficking occurs, marking the beginning of phase P2.  
134 This phase is characterized by a slower spreading rate, the maturation of focal adhesions and the formation  
135 of stress fibers (Giannone *et al.*, 2007; Dubin-Thaler *et al.*, 2008; Gauthier *et al.*, 2011).

136 To investigate spectrin recruitment to the PM during the various spreading phases, we fixed MEFs at  
137 different time points after seeding (within 5-20 minutes). We found a linear correlation between the  
138 amount of endogenous  $\beta$ II-spectrin and the projected cell area in the TIRF plane, likely reflecting the ability  
139 of spectrin to associate constantly with the PM (Figure S3 C-D, Table 1). Actin signal, instead, deviated more  
140 significantly from linearity as a result of a more complex and dynamic behavior during the different  
141 spreading phases, such as the transition from a lamellipodia-driven in P1 to a stress fiber-driven behavior  
142 during polarization (Iskratsch, Wolfenson and Sheetz, 2014). We also confirmed the spectrin exclusion from  
143 actin-rich protruding edges (Figure S3 A-B), in agreement with the observations at the leading-edge of  
144 polarized cells (Figure 1). However, the apparently constant spectrin/PM ratio measured at the whole-cell  
145 scale was more heterogeneous at subcellular meso-scale and evolved during spreading. In live cells, the

146 analysis of the dynamic of GFP- $\beta$ II-spectrin and RFP-actin throughout all the different phases of spreading  
147 confirmed the dynamic complementarity of the two cytoskeletons. In particular, actin was invariably  
148 associated with protrusive processes that promoted cell area growth, while spectrin displayed a passive-like  
149 behavior and was enriched in non-protrusive PM regions (Figure 2 B, Movie 1). Radial kymographs were  
150 generated to correlate fluorescence intensity in a 3.2  $\mu\text{m}$  cell edge boundary with the local edge speed (see  
151 methods), where protrusions (positive speed) and retractions (negative speed) occurred over time (Figure 2  
152 C-G). Spectrin and actin intensities displayed opposite trends. Actin intensity peaked in protruding  
153 lamellipodia ( $\approx 0.08\text{-}0.12 \mu\text{m}/\text{sec}$ ) as previously observed (Dubin-Thaler *et al.*, 2008), but decreased in  
154 correspondence of regions of highly positive speeds ( $>0.15 \mu\text{m}/\text{sec}$ ) and, more significantly, when the edge  
155 movement went from null to negative speeds (Figure 2 D-E). These findings are consistent with the  
156 possibility that actin becomes diluted (less intense) in fast protruding lamellipodia (Ryan *et al.*, 2012;  
157 Mueller *et al.*, 2017). Spectrin intensity displayed an opposite behavior, suggesting that it may act to  
158 protect the integrity of the PM upon actin withdrawal, independent from myosin II contractility in this  
159 specific cellular compartment (see blebbistatin treatments, Figure 2 F-G). Peculiar edge-collapsing events  
160 during the contractile phase (P2), the consequence of the localized exhaustion of actin propelling activity  
161 and the subsequent actin withdrawal from the cell edge, were marked by a sudden increase in spectrin  
162 intensity (Figure S4 A-B, Movie 4). Global inhibition of contractility retained the opposite dynamic of  
163 spectrin and actin at the edge (Figure 2 F-G), but also led to increased actin polymerization during  
164 protrusion (Figure 2 G compared to 2 E). Altogether these quantitative dynamic observations provide  
165 support to a model whereby actin/spectrin are mutually exclusive both spatially and temporally along with  
166 the cell leading-edge during fast remodeling events and suggest the involvement of spectrin during cellular  
167 retraction.

168 We next focused our attention to the spectrin dynamics under the cell body during spreading (Figure 3  
169 A-C, Movie 2). Fixed and live TIRFM analysis showed that the spectrin mesh is progressively deployed and  
170 laid down by the cell from the back of the leading-edge during P1 (Figure 2 B and Movie 1) while apparent  
171 slight condensation in the lamella region was observable (Movie 1). Consistently, thin confocal section

172 analysis of the dorsal cortex in P1 revealed a homogenous intermingled acto-spectrin meshwork behind the  
173 lamellipodia (Figure S3 A-B). This indicated that the non-contractile dorsal cortex of the cell was having  
174 similar organization than the ventral one. During P2, the spectrin meshwork under the cell body  
175 underwent a drastic remodeling in correspondence with the increased acto-myosin dynamic (Movies 1-2).  
176 Actin nodes were formed in this specific spreading phase, priming stress fiber maturation by condensation  
177 (Movie 2, Figure 3 A and B). Remarkably, the spectrin mesh appeared to move in coordination with these  
178 expanding and condensing nodes, albeit not showing colocalization at TIRFM resolution. Myosin II  
179 inhibition prevented such remodeling events without affecting the mutually exclusive actin/spectrin  
180 distribution at the cell edges, nor the formation of poorly mobile actin nodes in spectrin depleted zones  
181 (Figure 2 F-G, Movie 1 and 2). Cross-correlation PIV analysis of actin and spectrin flows highlighted areas of  
182 coordinated motion in terms of magnitude and directionality. This correlation landscape was analyzed  
183 during P2 in cells untreated and treated with blebbistatin, highlighting a significant decrease in size for  
184 areas of correlated motion (Figure 3 C, yellow zones) upon contractility inhibition (see the wider  
185 distribution of the measured areas in the plot of untreated cells, Figure 3 D). Thus, spectrin and acto-  
186 myosin define large membrane meso-scale territories (up to  $100 \mu\text{m}^2$ ) moving in a coordinated manner,  
187 clearly highlighting that the supramolecular mesh-like organization of spectrin is dynamically cross-  
188 organized by acto-myosin remodeling.

189 The critical role of the acto-myosin cytoskeleton in spectrin dynamic organization was confirmed by  
190 monitoring protein flows after latrunculin A and blebbistatin washout experiments (Figure 3 E-F, Movie 3).  
191 Consistent with the physiological observation in spreading cells, spectrin expanded and redistributed upon  
192 acto-myosin stress fiber dissociation, and further augmented at cell leading-edges upon cell retraction.  
193 During the drug washout phase, acto-myosin nodes drove local spectrin coalescence as cells restored their  
194 cytoskeletal architecture (Figure 3 E-F, Figure S3 F and Movie 3). The formation of actin nodes in spectrin-  
195 less zones was also confirmed by monitoring the distribution of endogenous proteins after latrunculin A  
196 washout in free-standing “cortex mimicry” zones between patterned fibronectin lines (Figure S3 F). These  
197 results further indicate that a similar coordinated organization of the spectrin and actin meshworks occurs  
198 in the non-adhesive cell cortex.



199 We conclude that the spectrin cytoskeleton is a continuous meshwork tightly associated with the PM,  
200 covering it almost entirely. However, its local density under the PM can largely fluctuate upon changes in  
201 cell geometry, dynamics and mechanics. Spectrin locally condenses during events characterized by low  
202 actin-PM interaction, such as during membrane retraction at cell edges or the remodeling of cortical acto-  
203 myosin nodes that lead to the formations of actin fibers, stress fiber ultimately defining spectrin-rich  
204 territories.

#### 205 **Spectrin molecular turnover depends on contractility**

206 To address whether actin dynamics or acto-myosin contractility control the dynamics of the  
207 membrane-associated spectrin meshwork, we monitored changes in the GFP- $\beta$ II-spectrin signal upon  
208 latrunculin A or blebbistatin treatments. 5 or 30 minutes after treatment, no alteration in global spectrin  
209 density (over the projected cell area) was detected by TIRFM, indicating that spectrin recruitment to the  
210 PM was independent of actin polymerization or myosin II contractility (Figure 4 A-B), in accordance with the  
211 analysis of endogenous proteins during spreading (Figure S3 C-D). We validated our approach using the  
212 spectrin/PM oxidative crosslinker diamide (Deuticke *et al.*, 1983). In this case, 5 minutes after treatment  
213 spectrin intensity increased, significantly and constantly, up to 30 minutes. This result confirmed that  
214 changes in spectrin density based on fluorescence intensity could be observed upon drug perturbations by  
215 our approach (Figure 4 A-B). Since microtubules (MT) have also been proposed to control  $\beta$ II-spectrin and  
216  $\beta$ V-spectrin dynamics at cell-cell junctions (Jenkins, He and Bennett, 2015; Duan *et al.*, 2018), we  
217 investigated their role in  $\beta$ II-spectrin recruitment to the cell cortex. Upon MT depolymerization, even at  
218 early time points (5 minutes), spectrin density increased by almost 20% (Figure 4 A-B). Thus, MT can  
219 control, at least in part, the recruitment of spectrin to the PM. However, given the broad effects of MT  
220 depolymerization on membrane trafficking, we cannot exclude that nocodazole treatment, known to block  
221 exocytosis and not endocytosis (Gauthier *et al.*, 2009), may reduce PM area driving the apparent spectrin  
222 condensation.

223 We next investigated the mechanisms regulating spectrin turnover by FRAP analysis upon drug  
224 treatment (LatA, Blebbistatin, Nocodazole, Diamide). Since maximal response to the drugs was observed

225 after 5 minutes, a dual-FRAP assay on single cells expressing GFP- $\beta$ II-spectrin was performed before and  
226 after 5 minutes of treatment to avoid secondary effects driven by long-term cytoskeletal perturbation  
227 (Mikulich, Kavaliauskiene and Juzenas, 2012; Signoretto *et al.*, 2016) (Figure 4 C-E). The impairment of actin  
228 filament turnover by latrunculin A did not affect significantly either the half-time recovery (Figure 4 D) or  
229 the mobile fraction of spectrin (Figure 4 E, Extended Table 2). Instead, myosin-II inhibition by blebbistatin  
230 caused a significant reduction in the mobility of spectrin with an increased half-time recovery. As expected  
231 for protein crosslinking experiments, diamide-treated cells showed severely reduced spectrin dynamics.  
232 During nocodazole treatment, instead, spectrin mobile fraction was not affected, consistent with the  
233 potential indirect implication of MT in actin reorganization rather than a direct effect on spectrin dynamics.  
234 Overall, our results show that spectrin molecular turnover relies strongly on contractility.

### 235 **The actin-binding ability of spectrin is needed to coordinate spectrin dynamics with changes in cell** 236 **mechanics**

237 Since the spectrin meshwork dynamics depended on contractility and actin polymerization, we  
238 discerned the contribution of the spectrin domains that bind to actin or the membrane by deletion  
239 mutants. The actin binding domain (ABD) is present only in  $\beta$ -spectrins subunit which also harbors at least 3  
240 PM anchoring points (Machnicka *et al.*, 2014). We generated mutants of  $\beta$ II-spectrins deleted for the actin-  
241 binding ( $\Delta$ ABD), or the phosphatidylethanolamine-binding ( $\Delta$ PE) or the phosphatidylserine-binding domain  
242 ( $\Delta$ PS) (Figure 5 A-B). GFP-tagged mutants were expressed in fibroblasts, analyzed by FRAP and compared to  
243 full-length FL- $\beta$ II-spectrin construct for turn-over and mobility (Figure 5 C-E, Extended Table 2 ( $\Delta$ PS results  
244 are only reported in Extended Table 3)). The actin binding mutant,  $\Delta$ ABD, displayed an increased mobile  
245 fraction (87.2%) and a decreased half-time recovery ( $t_{1/2}$ =24.56 sec) as compared to the FL construct  
246 (mobile fraction=74.8%,  $t_{1/2}$ =41.7 sec). The  $\Delta$ PE mutant displayed mildly decreased half-time ( $t_{1/2}$ =56.8 sec)  
247 while the mobile fraction was comparable to the FL- $\beta$ II-spectrin (73.2%). Similar results to  $\Delta$ PE were  
248 obtained for  $\Delta$ PS mutant (Extended Table 3). The individual GFP-tagged PE-domain displayed a diffusive  
249 behavior through the lipid bilayer as expected from a freely diffusive lipid-binding domain (Figure 5 D,  
250 inset). On the other hand,  $\Delta$ ABD,  $\Delta$ PE and  $\Delta$ PS mutants were all correctly targeted to the PM and excluded

251 from actin stress fibers (Figure S4), as they likely incorporate into tetrameric complexes with endogenous  
252  $\alpha$ -spectrin. These results indicate that the actin-binding domain is critical for spectrin meshwork  
253 stabilization but not its localization, while potential cooperative mechanisms exerted by different lipid-  
254 binding domains ensure PM-targeting.

255 When looking at the cell shape remodeling mechanisms during spreading,  $\Delta$ ABD expressing cells  
256 underwent a normal P1 phase, while several collapses of protrusions were observed during the contractile  
257 phase (P2, Movie 4 and 5). In accordance with our FRAP results, spectrin meshwork cohesion through actin  
258 protofilaments binding appears instrumental to sustain PM when contractility is at play (Movie 4 and 5).  
259 These collapsing events were different from the retractions described earlier where spectrin replaced the  
260 actin-based support to the lipid bilayer. Here, simultaneous collapses of actin and spectrin were observed  
261 (Figure 5 F and Figure S4 E-F), followed by further attempts of the cell to spread over the substrate. As a  
262 consequence of these set of events, we recorded a negative  $\Delta$ area/min rate since positive values were  
263 offset by negative events (during the 10 minutes spreading phase after the transition in P2, Figure 5 F-G).  
264 On the contrary, FL- $\beta$ II-spectrin expressing cells displayed a stereotypical steady increase in area during P2;  
265  $\Delta$ PE expressing cells spread even faster than the FL-expressing cells and retraction zones highlighted with a  
266 remarkable  $\Delta$ PE-spectrin accumulation (Figure S4, Movie 4).

267 Altogether these results indicate that the binding of  $\beta$ II-spectrin to actin protofilaments rather than PM  
268 is key for a correct meshwork dynamic during myosin II driven contractility, conferring resilience to the cell.

269 **Spectrin is condensed in actin-poor retracting zone under cell-stretch and is depleted in actin-rich blebs**  
270 **induced by compression**

271 After establishing the dynamic response of spectrin during cell shape re-arrangement, we tested the  
272 reaction of the spectrin meshwork to perturbation of cell mechanics induced by stretching and compressive  
273 stresses. Indeed, if the spectrin meshwork condensation was a general mechanism to preserve cell and PM  
274 integrity (as shown in Figure S4 for cell shape changes), it may also display similar dynamic behavior under  
275 environmentally-driven mechanical perturbations. To test this hypothesis, MEFs were seeded on a

276 deformable silicone membrane. Polygonal cells, characterized by the presence of long arcs between  
277 adhesive protrusions, were monitored during biaxial stretch on a custom-built device that could impose an  
278 increase in the stretch of up to 30% of the initial area (Figure 6 A-B, see methods). Since silicone membrane  
279 limits the possible imaging methods to wide-field illumination, we excluded moderate to high  
280 overexpressing cells from the analysis to avoid artefacts. Under stretching, GFP- $\beta$ II-spectrin-expressing cells  
281 retained most of the prominent adhesions onto the substrate, while actin treadmilling activity at  
282 lamellipodia was blocked (visualized by Lifeact-RFP, Figure 6 B, double asterisks), as we previously reported  
283 (Pontes *et al.*, 2017). Consistent with our previous observations, spectrin signal sharpened in the arc-  
284 shaped zones under progressive stretch, creating a frame around the cell that disappeared when the  
285 stretch was released (Figure 6 B).

286 Further insights were also provided by the brutal detachment of less strongly attached adhesions in cells  
287 subjected to the gradual stretching protocol. Differently from the cell-driven retractions observed during  
288 spreading assay, actin and spectrin scaffolds condensed simultaneously and colocalized in the collapsed  
289 zone (Figure S5 F-H). Notably, this was the only mechanical events leading to apparent colocalization  
290 between the two cytoskeletons. We interpreted that in those particular fast events, actin and spectrin  
291 meshworks react passively as opposed to all the other mechanical perturbations where the crosstalk  
292 between the two leads to fine-tuned adaptation and reorganization. Spectrin meshwork active  
293 condensation in arc-shaped membrane retractions (i.e. spectrin-rich membrane curvatures) might be a  
294 process that operates in the absence of local actin under extrinsic (stretch) as well as intrinsic  
295 (spreading/polarization, Figure S4) mechanical challenges.

296 Next, we monitored spectrin meshwork dynamics under compressive stresses. We built a custom device  
297 to apply longitudinal, uniaxial compression/relaxation cycles on single cells, which were monitored in real-  
298 time by TIRFM (Figure 6 C-G, Figure S5 C-E, Movie 6). The increase in intracellular pressure caused by the  
299 compressive strain affected cell cortex integrity and induced the formation of blebs (Figure S5 C-D). Direct  
300 readout of the applied force on single cells is not possible in our setup due to variations in cell height,  
301 therefore the compressive piston was gradually lowered until cells showed blebbing. Compression-induced

302 blebs (i-bleb) clearly displayed the flow of cytosolic actin directed into the newly formed blebs, while the  
303 majority of the spectrin signal was retained in the cell body (Figure S5 C-E). Upon the release of the piston,  
304 i-blebs were resorbed into actin-enriched tubular-like structures devoid of spectrin.

305 These results show that spectrin and actin skeletons display clearly distinct spatio-temporal dynamics  
306 depending on the nature of the mechanical challenge. Upon fast event, like cell detachment, both the actin  
307 and spectrin meshwork passively condense forming an undistinguishable “plug-like” structure as cell  
308 retract. Instead, during controlled retraction, spectrin can condense in actin-poor zones and that appear to  
309 support the PM. On the contrary, in fast-protruding zones non-actively driven by the actin cytoskeleton, like  
310 in mechanically-induced blebs, spectrin can be uncoupled from the PM, potentially preserving cell cohesion  
311 and cytosolic content, while actin flows into the bleb and progressively polymerizes into defined structures,  
312 as previously observed (Charras *et al.*, 2006).

### 313 **Spectrin, actin and plasma membrane create a continuous but dynamic composite material**

314 Surprisingly, we consistently observed that azimuthal uniaxial compression caused the nucleus to act as  
315 a dissipating additional piston on the cell cortex facing the coverslip (visualized by TIRFM), inducing most of  
316 spectrin and actin reactions to occur underneath this organelle in relatively flat MEFs. To shed further light  
317 on this phenomenon and better control the magnitude of the compression, we applied cycles of  
318 compressions/relaxations (2+2 minutes) at increasing strength (Figure 6 C-D, Movie 6). Piston contact with  
319 the cell roof marked the first compression step and did not affect basal spectrin signal. The piston was  
320 further lowered increasing progressively the stress on the cell. As compression increased, spectrin  
321 fluorescence increased right under the nucleus (Figure 6 E-F and Figure S5 B). Simultaneously, an  
322 unexpected spectrin- and actin-depleted rim formed in correspondence of the nuclear envelope (Figure 6  
323 E). Remarkably, *de novo* actin-polymerization characterized by concentric inward flow specifically occurred  
324 in this bare PM region within the 2 minutes of compression (Figure 6 F and Movie 6). Careful examination  
325 showed spectrin tethered by few fibrous stretches across the rim (Movie 6). The release of the compressive  
326 stress blocked actin polymerization and was followed by a fast disappearance of the actin speckles (Figure 6  
327 E, Movie 6). Upon relaxation, spectrin reacted completely differently than actin, since it immediately closed

328 the rim without leaving a track of the tear in the meshwork, entangling and fencing the few remaining actin  
329 speckles (Figure 6 E-F and Movie 6). Occasionally, a similar behavior could also be observed by  
330 compression-relaxation of large cytosolic vesicles (Figure S5 A). Co-staining of PM with spectrin indicated  
331 that the membrane kept its integrity during the entire compressive stress (Figure 6 G).

332 These results represent a direct experimental demonstration of our previous observations on the  
333 dynamic cooperation between actin and spectrin in the cortex under mechanical challenges. Indeed,  
334 spectrin acts as an elastic continuous meshwork which can be stretched and depleted locally, thus working  
335 as a fence for the actin skeleton. On the other hand, bare PM is not a stable condition and the  
336 spectrin/actin cortex is constantly trying to occupy cytoskeletal-free space by covering it like a fluctuating  
337 elastic “veil-like” structure (spectrin) or polymerizing on it (actin).

338 Finally, to study more directly the spectrin elastic behavior in supporting the PM, osmotic shocks were  
339 applied to the cells as a third paradigm of environmentally-driven mechanical perturbation. These  
340 experiments aimed to simulate cycles of stretch-relaxation of the PM, while allowing us to monitor  $\beta$ II-  
341 spectrin reactions. Mean fluorescence intensity changes were simultaneously recorded for  $\beta$ II-spectrin and  
342 a fluorescent PM marker over the projected cell area. Spectrin fluorescence alone, registered by TIRFM,  
343 showed reduction during hypotonic shocks and increase during isotonic relaxation, however, the ratio  
344 between  $\beta$ II-spectrin/PM signals did not significantly shift from the initial ratio during several subsequent  
345 cycles (Figure S6 A-B). When soluble GFP was used as non-membranous control, consistent reduction in the  
346 GFP/PM ratio during hypotonic shocks could be recorded (Figure S6 C-D), while dual-tagged GFP- $\beta$ II-  
347 spectrin-mCherry displayed a constant ratio (data not shown). Interestingly, ratiometric images failed to  
348 display homogeneous intensity throughout the entire cell, suggesting zonal enrichment or depletion of one  
349 of the two components. Local analysis during osmotic shocks displayed an initial reduction in the  $\beta$ II-  
350 spectrin/PM ratio that was compensated during later shocks, while a second region of the same cell  
351 matched the linear ratio shown over the entire cell projected area (Figure S6 E-F). Active lamellipodia  
352 during isotonic recovery behaved as expected, displaying reduced  $\beta$ II-spectrin/PM ratio compared to the  
353 adjacent cell body (Figure S6 G). Conversely, under hypotonic shock, increase in PM tension abruptly

354 blocked lamellipodia activity (Figure S6 G) as previously reported (Gauthier, Masters and Sheetz, 2012;  
355 Kosmalka *et al.*, 2015).

356 Altogether these results support the existence of local redistribution mechanisms of the spectrin mesh  
357 at meso-scale level. We concluded that  $\beta$ II-spectrin elastic support of the PM at whole-cell level is  
358 maintained by keeping constant the ratio between the two components, while it can locally and transiently  
359 drift to allow the occurrence of specific PM-linked events.

### 360 **Endocytic dynamic integration in the spectrin/actin/plasma membrane composite**

361 Spectrin dynamics and the complementary interplay with actin pointed out the ability of the two  
362 meshwork to create PM microdomains that are consistent with the revised fluid-mosaic model of PM  
363 organization (Kusumi *et al.*, 2012). Spectrin has been associated with PM organization, potentially  
364 positioning clathrin-mediated endocytosis (CME) events at cell-cell junctions (Jenkins, He and Bennett,  
365 2015). We tested whether spectrin was also involved in this mechanism in fibroblasts by providing  
366 molecular details of the clathrin pit distribution and dynamics in fixed and live specimens. By  
367 immunostaining analysis of endogenous clathrin-heavy-chain (CHC),  $\beta$ II-spectrin and actin, we found that  
368 the three molecular components were not colocalized and appeared rather mutually excluding each other  
369 (Figure 7 A, Figure S7 H). To strengthen this observation, multiple discrete clathrin structures were  
370 selected, registered in  $2 \times 2 \mu\text{m}$  ROIs and clustered into two groups of different size ( $<300\text{nm}^2$  and  $300-$   
371  $500\text{nm}^2$ ) following a recently published approach (Mund *et al.*, 2018). The density maps displayed clathrin  
372 pits positioned at the center of spectrin-depleted zones surrounded by spectrin-rich areas. Remarkably, the  
373 diameter of the averaged spectrin-depleted zones almost matched in size the clathrin pits projections  
374 (Figure 7 B-C). While most of the high-intensity actin structures, such as stress fibers, were clearly distinct  
375 from the pits, the averaging of  $>100$  pits led to the identification of a discrete actin enrichment in  
376 correspondence of the clathrin staining (Figure 7 A-C). These observations are fully consistent with the  
377 current maturation models of endocytic structures (Kaksonen and Roux, 2018; Kirchhausen, 2009). Our  
378 analysis indicates that a potential hindrance mechanism might be at work. According to this, the spectrin  
379 meshwork is able to delimit the zones of the assembly of clathrin pits.

380 Live imaging analysis confirmed the exclusion of GFP- $\beta$ II-spectrin from clathrin structures visualized by  
381 the adapter mCherry-AP2 $\sigma$ . Specifically, AP2-decorated pits appeared in the void patches that  
382 characterized the spectrin meshwork (Figure 7 D-E-F). Notably, the membrane-bound PE-domain of  
383 spectrin used here as negative control did not display the same behavior. CME is a highly dynamic and  
384 heterogeneous process with several layers of regulation, including membrane tension modulation by  
385 osmolarity (Boulant *et al.*, 2011). Therefore, we monitored this process with respect to the dynamic  
386 spectrin re-organization during osmotic changes. As expected, decreased spectrin signal intensity during  
387 hypotonic shocks was accompanied by a fast-transient increase and followed subsequently by severely  
388 reduced AP2 intensity, which was restored after the transition to isotonic conditions (Figure 7 G, Movie 7).  
389 More interestingly, kymograph analysis revealed coordinated flow between the two channels during cell  
390 adaptation motion, suggesting that AP2 pits are hooked to the spectrin meshwork. The same effect was not  
391 observed for AP2 and PE-domain only (data not shown). We compared discrete AP2 pits in cellular zones  
392 characterized by high and low GFP- $\beta$ II-spectrin densities during osmotic changes. Interestingly, when the  
393 spectrin cytoskeleton reorganized into large condensation zones, several pits disappeared from the TIRF  
394 plane, most likely engulfed by the fencing capability of the spectrin meshwork (Figure 7 H, Movie 7). This  
395 was not observed in low spectrin-density zones of the same cell, indicating that a local hindrance  
396 mechanism might be operative.

397 Altogether these results support a critical involvement of spectrin spatio-temporal reorganization in the  
398 positioning of endocytic structures.

## 399 Discussion

400 Here, we provide a universal view on how ubiquitous and evolutionary conserved spectrin dynamically  
401 interplays with acto-myosin, the lipid bilayer and the endocytic machinery to sustain the PM during intrinsic  
402 and extrinsic mechanoadaptive events. We recapitulated our main findings in the working model in  
403 Figure 7 I.

404 Our analysis of a variety of mammalian cells growing under various geometrical constraints, suggests  
405 that there are discrete PM territories supported either by an actin scaffold or by a spectrin skeleton.



406 Dynamic studies in fibroblasts spreading onto adhesive substrate unveiled the assembly mechanism  
407 governing spectrin meshwork organization during the early phase of cell-substrate interaction. Upon  
408 activation of acto-myosin contractility, coordinated motion of spectrin and coalescent actin nodes  
409 emphasize the interplay between the two scaffolds during full maturation of the cytoskeleton (Figure 7 I,  
410 cortex cycle 1 to 3). Remarkably, we observed spectrin meshwork dynamics to rely on myosin II contractility  
411 either during cytoskeletal maturation as well as in established cell cortex. Current models describing the  
412 transmission of myosin-dependent contractility at isotropic cortex hardly explain how forces exerted on  
413 non-polarized scaffolds can produce homogenous movement. Since cortical actin protofilaments might be  
414 too short and rigid to generate coherent contractility (Koenderink and Paluch, 2018), the hierarchical  
415 actin/spectrin organization and the cohesiveness provided by the described meshwork have the potential  
416 to reconcile this paradox. This is highlighted by the expression of the spectrin  $\Delta$ ABD mutant, documenting  
417 edge instability characterized by synchronous spectrin/actin retraction (Figure 7 I, zone III). We speculate  
418 that in the actin-poor but spectrin-rich lamella, the spectrin meshwork can act as a force-transmitting “veil-  
419 like” structure underneath the PM. This veil creates a continuum at the lamellipodia/lamella border with  
420 the contractile structure localized deeper in the cell body. The dominant-negative  $\Delta$ ABD expression might,  
421 thus, uncouple these distinct frameworks and create a mechanical discontinuity in this cohesive  
422 architecture. However, also long-term perturbation of the other cytoskeletal systems, such as  
423 microtubules, can affect the organization and the cohesiveness of the spectrin meshwork and associated-  
424 proteins (Jenkins, He and Bennett, 2015), albeit with different mechanisms and time-scale that require  
425 further investigations.

426 Our results during extrinsic mechanical perturbations suggest that spectrin works as a sum larger than  
427 its individual parts (dimers and tetramers) and reacts differently depending on the nature of the applied  
428 mechanical cues. We provide further support to a fencing mechanism brought about by macromolecular  
429 condensation upon mechanical stimuli, firstly proposed in neuronal axons under compressive and bending  
430 forces, rather than a molecular stretch/relaxation model based on intramolecular distance discrepancies  
431 between different EM and super-resolution studies, (Krieg, Dunn and Goodman, 2014; Krieg *et al.*, 2017).

432       Altogether, our results consistently highlighted the opposite polarity between the spectrin skeleton and  
433 actin, either during extrinsic perturbation or intrinsic cell polarization. To the best of our knowledge, this is  
434 the first dynamic and mechanistic description of actin/spectrin dualism during cell shape remodeling  
435 events. Based on different mechanical perturbations of the PM, we propose that spectrin is maintained  
436 globally at a constant ratio with the lipid bilayer. Locally, it reacts instead to intrinsic cues, such as PM  
437 collapse (Figure 7 I, zone VII), or to external perturbations, such as cell-cell fusion (Duan *et al.*, 2018). These  
438 reactions correspond to a meshwork condensation rather than *de-novo* recruitment, as a self- and cell-  
439 protective mechanism. The actin/spectrin coordinated dynamics is particularly exploited during spectrin  
440 cortex clearance induced by mechanical compression of the cell, which triggered an actin nucleation-  
441 dependent protective mechanism in response to spectrin displacement (Figure 7 I). Together with spectrin  
442 exclusion from protrusive lamellipodia (Figure 7 I, zone I), these results suggest the existence of a  
443 previously neglected interference mechanism that hinder actin polymerization in presence of a spectrin-  
444 enriched cortex.

445       Our observations during different environmental perturbations strongly support the existence of a non-  
446 Brownian diffusion mode of the spectrin skeleton through the PM (Frick, Schmidt and Nichols, 2007).  
447 Indeed, the spectrin meshwork defines PM microdomains able to constantly remodel in response to  
448 external and internal cues. Such capacity integrates well into the revised “three-tiered meso-scale” version  
449 of the fluid-mosaic model of PM organization (Nicolson, 2014; Kusumi *et al.*, 2012) and can complement  
450 the so-called “picket and fencing” mechanism prominently led by the actin cortex. Here, we implemented  
451 this model by adding the spectrin-rich territories in the context of membrane dynamics and topological  
452 microdomain organization. As previously hypothesized from biochemical data (Jenkins, He and Bennett,  
453 2015), we observed membrane trafficking events, such as CME, taking place at PM microdomains  
454 “hamstrung” by spectrin, while pits maturation sustained by actin polymerization occurred specifically  
455 within spectrin fenestration (figure 7 I, cortex cycle 1 to 3). Of note, several mechanisms have been  
456 identified in the regulation of CME, many of them showing discrepancies and controversy with one another  
457 (Doherty and McMahon, 2009). Thus far, none of them has clearly taken into consideration the role of the

458 spectrin meshwork and its local re-organization. Such a role in organizing PM trafficking events is consistent  
459 with a recent report proposing spectrin as a general ruler for cell-cell adhesion molecules organization in  
460 neurons (Hauser *et al.*, 2018). Since it is reasonable to imagine similar mechanisms for membrane  
461 trafficking pathways by opposite directionality, we propose that the highly dynamic composite nature of  
462 the cortex under mechanoresponses is mainly regulated by an orchestrated “*menage a 4*” between PM,  
463 spectrin, exo/endocytosis and acto-myosin contraction-polymerization (see our conclusion model Figure 7  
464 I). More generally, these results indicate that the spectrin skeleton dynamics is critical to shape and  
465 coordinate many PM-linked cellular processes in physiology and pathology.

#### 466 **Acknowledgements**

467 We are grateful to the IFOM imaging facility personnel, in particular D. Parazzoli, M. Garre` and E. Martini  
468 for technical support. IFOM cell culture facility and qPCR facility personnel. We thank Jagadish Sankaran  
469 (NUS) and Toh Kee Chua (NUS) for the preliminary experiments of this project. We thank MBI protein core  
470 facility personnel, in particular Chen Hongying for providing the constructs. We thank Paulina Nastaly  
471 (IFOM) for the help with micropatterning. We thank Mike Sheetz (MBI), Marco Foiani (IFOM), Sarah Barger  
472 (NYU) and all the members of Gauthier’s, Scita’s and Maiuri’s groups for helpful discussion. We thank Sara  
473 Sigismund (IEO) for kindly providing additional constructs. This work was supported by IFOM starting  
474 package, Mechanobiology Institute of Singapore grant WBS R-714-016-007-271, and the Italian Association  
475 for Cancer Research (AIRC), Investigator Grant (IG) 20716 to NCG, by H2020-MSCA individual fellowship to  
476 AG (796547) and by Fondazione Umberto Veronesi (FUV) doctoral fellowship for CG.

#### 477 **Author contribution**

478 AG, NCG contributed to the conception and design of the experiments, interpretation of data, drafting and  
479 critical revision of the article. AG, CG, NCG, QL, FA, PM performed the experiments. QL and FA conceived  
480 the engineered devices and helped with the experiments. AG, NCG, MAF, PM contributed to data analysis.  
481 All authors critically revised and approved the last version of the article.

#### 482 **Declaration of Interests**

483 The authors declare no competing financial interests.

484

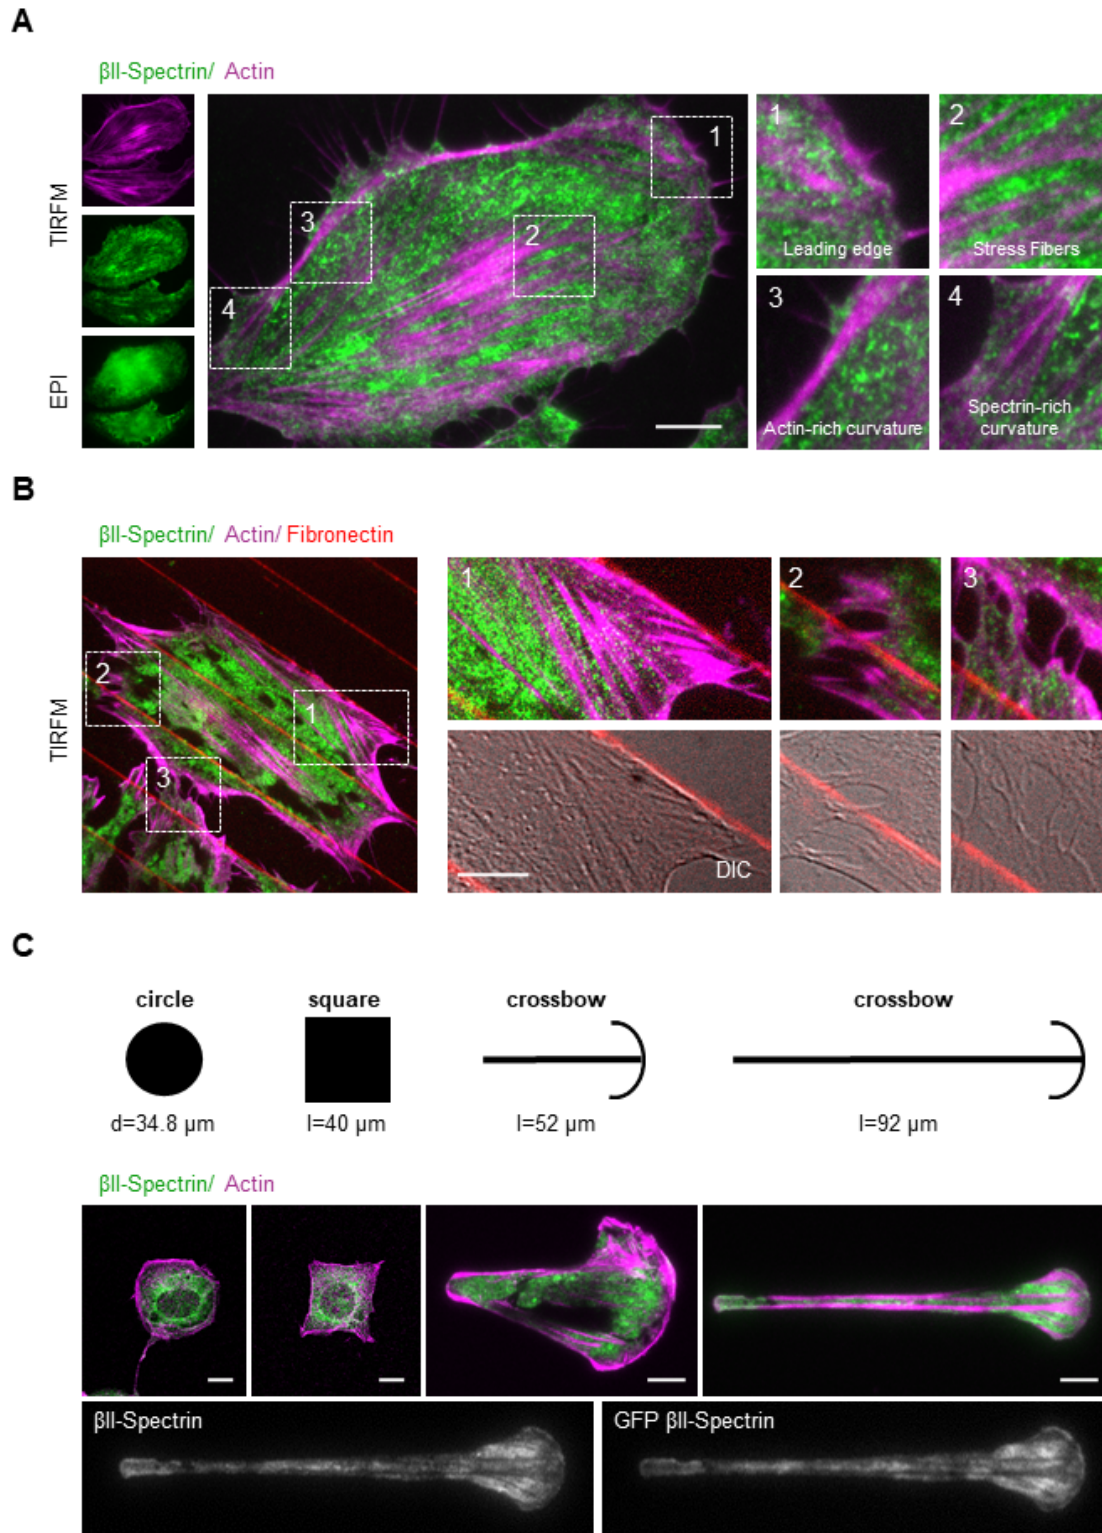

485  
486

**Figure 1.  $\beta$ II-Spectrin and Actin define distinct and complementary plasmamembrane territories**

487 A) MEFs immunostained for endogenous  $\beta$ II-spectrin (green) and F-actin (magenta), observed by  
488 simultaneous TIRFM and EPI-fluorescence microscopy (scale bar: 10  $\mu\text{m}$ ). Four different cell zones are  
489 highlighted (dashed boxes, 1-4), displaying regions by distinct morphological features. B) MEFs seeded

490 between adhesive fibronectin lines (red) and non-adhesive substrate (black), are visualized by TIRFM  
491 (endogenous  $\beta$ II-spectrin in green and actin in magenta, scale bar: 5  $\mu$ m). Three different zones are  
492 highlighted by the dashed boxes: 1-2) cell adhesions, 3) cell-cell contact. C) Different geometries have been  
493 imposed on cells: circle and square (confocal), short and long crossbow (TIRFM). Immunostaining for  
494 endogenous  $\beta$ II-spectrin (green) and F-actin (magenta) are shown. The cell on the longer crossbow is  
495 transfected for GFP- $\beta$ II-spectrin, immunostained for both endogenous and GFP-transfected proteins (scale  
496 bar: 10  $\mu$ m).

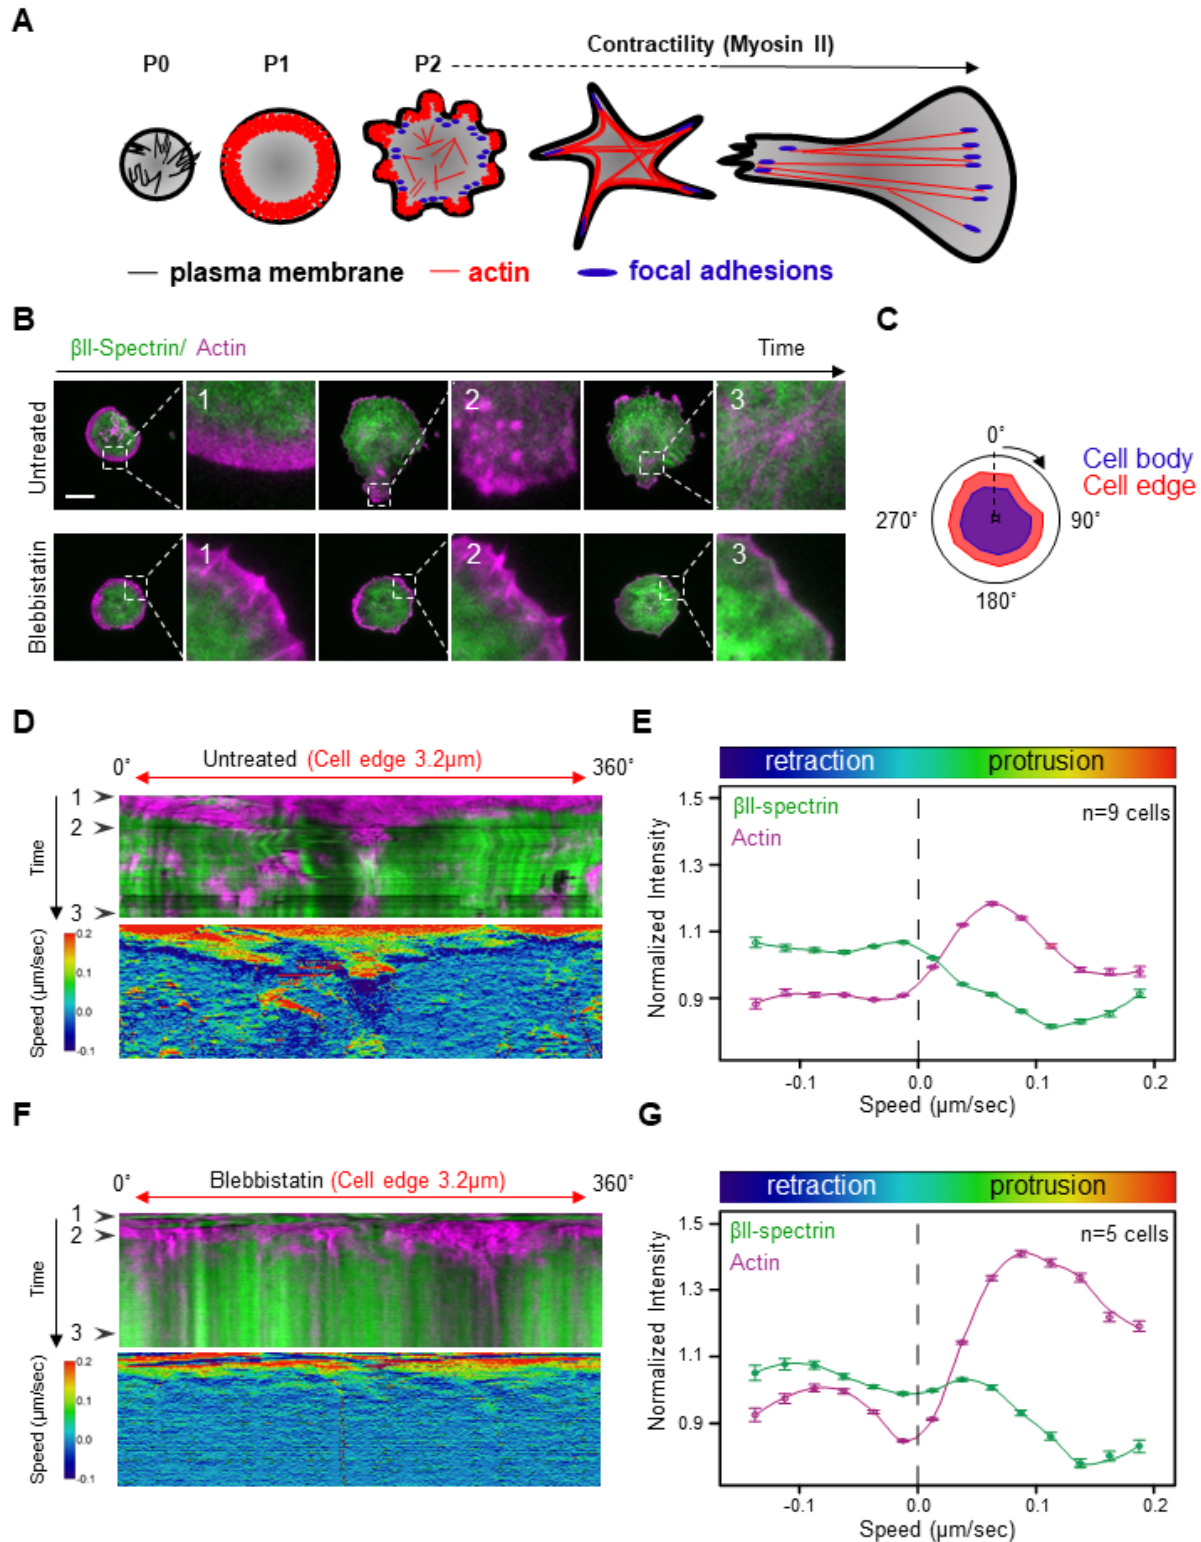

497

498

**Figure 2.  $\beta$ II-Spectrin and Actin dynamics during spreading**

499

A) Schematic representation of the different phases occurring during fibroblasts spreading on fibronectin-coated surfaces. The morphological changes in terms of cell shape, actin cytoskeleton (red), focal adhesions

500

formation (blue) and PM organization (black) are drawn. B) Cells untreated and treated with blebbistatin

501

502 are visualized by live TIRFM and representative images at relevant time points are shown (green: GFP- $\beta$ II-  
503 spectrin, magenta: RFP-actin, scale bar: 20  $\mu$ m). Peculiar mechanisms are highlighted by white dashed  
504 boxes and are zoomed in panels 1-3. In 1 is shown a typical non-contractile phase (P1), while the contractile  
505 phase (P2) is shown in 2; in absence of myosin II-dependent contractility (blebbistatin) cell spreading is  
506 stalled. In 3, coalescent actin nodes contribute to the maturation of the actin cytoskeleton, while  
507 blebbistatin treatment impairs these dynamic processes. C) Schematic representation of the radial  
508 segmentation of the cell edge (red, 3.2  $\mu$ m thickness) and cell body (blue) performed during the time-lapse.  
509 D-F) Radial kymograph analysis of cell edge behavior is presented in MEFs untreated (D) and treated with  
510 blebbistatin (F). The upper kymographs represent the integrated intensities of the two proteins (1-3 black  
511 arrowheads indicate the specific frames highlighted in the B panel), while the bottom kymographs display  
512 the edge speed related to the cell centroid. In E and G signal intensities are plotted (actin: magenta and  $\beta$ II-  
513 spectrin: green) in the function of speed (untreated: n=9 cells, blebbistatin: n=5 cells, mean $\pm$ SEM).



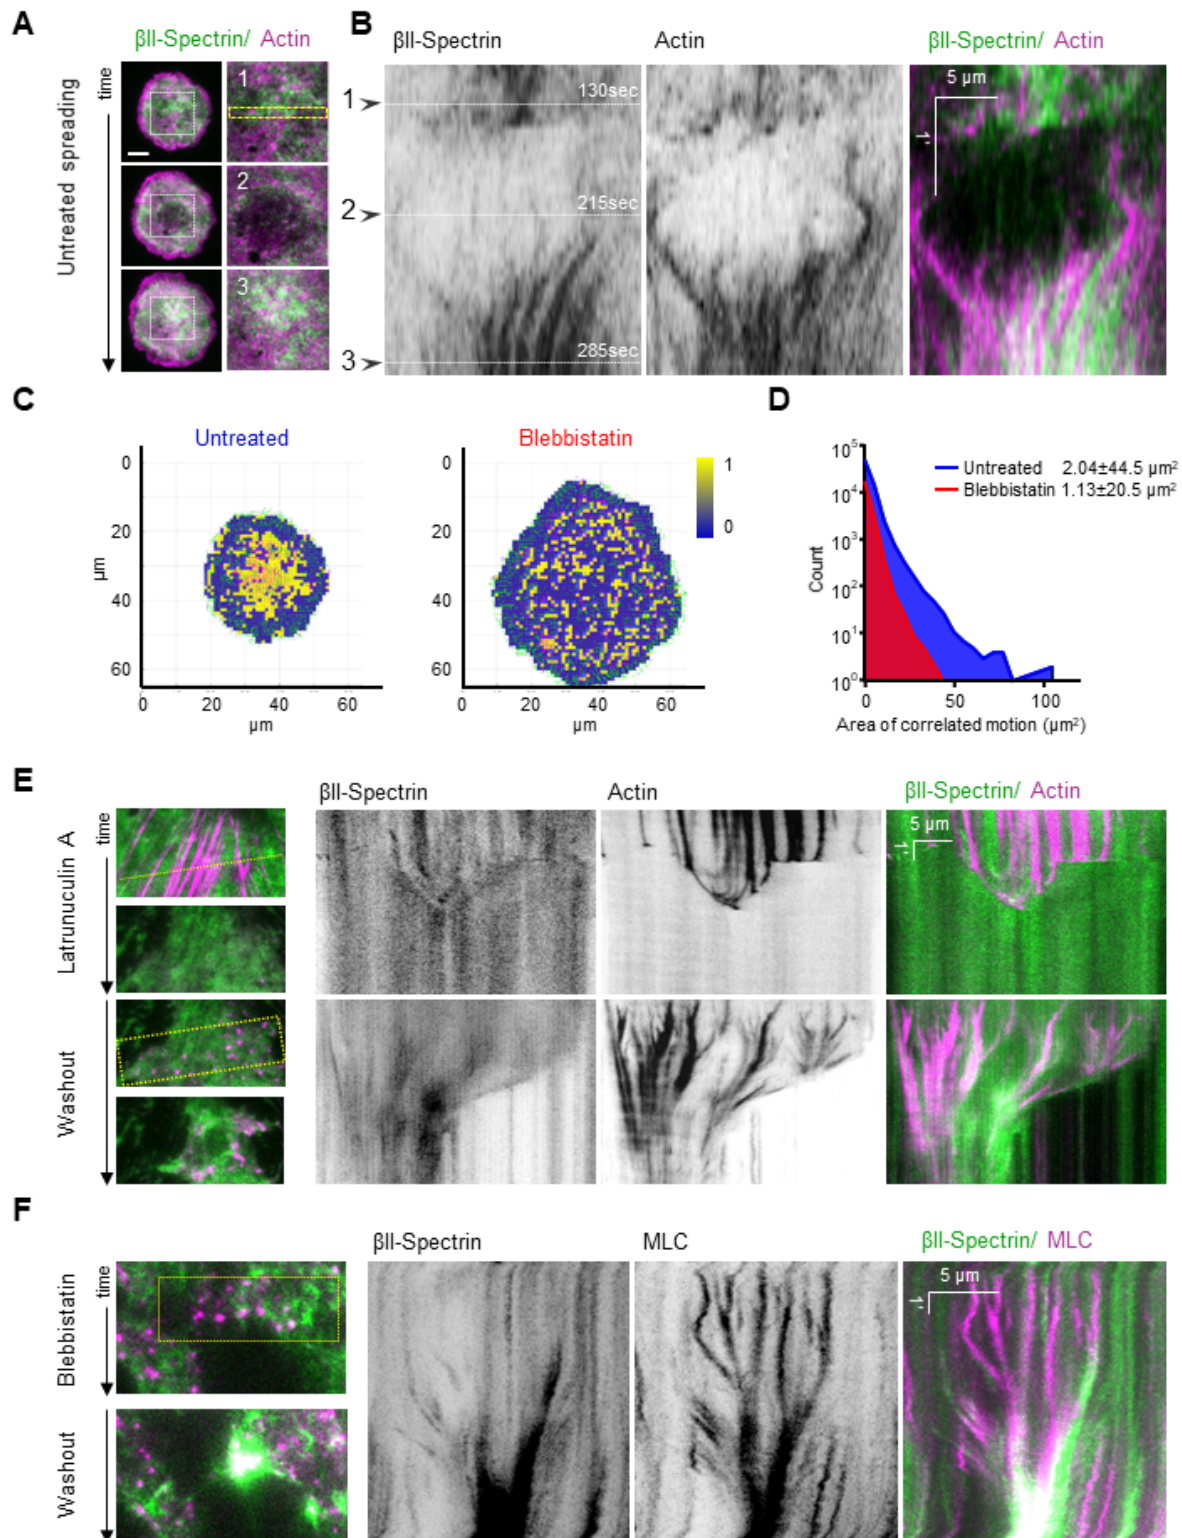

514  
515

**Figure 3. Actin nodes are instrumental for Spectrin organization**

516 A) Cell spreading analysis at the cell body (zooms corresponding to the dashed white boxes), displayed by  
517 live TIRFM images (green: GFP- $\beta$ II-spectrin, magenta: RFP-actin, scale bar: 10 $\mu$ m). Relevant events observed  
518 between independent experiments are shown (1-3), in particular endogenous actin nodes formation and



519 correspondent  $\beta$ II-spectrin behavior. B) Kymograph generated in the region highlighted by dashed yellow  
520 rectangle. Synchronous condensation and expansion of the two proteins is highlighted by the coordinated  
521 side motion in the kymograph, despite the evident absence of colocalization, black arrowheads (1-3)  
522 indicate the respective images shown in panel. C) Two representative images of correlated PIV analyses are  
523 shown for the two experimental conditions: cells untreated and treated with 50 $\mu$ M blebbistatin. In yellow  
524 are shown areas of high angular and speed correlation between the two proteins,  $\beta$ II-spectrin and actin.  
525 Otherwise no correlation is shown in the blue zones (binary LUT). D) Total distribution of “Area of  
526 correlated motion” (yellow patches) is shown in the final graph: as predicted untreated cells (blue, n=7  
527 cells) have higher mean area and larger distribution ( $\pm$ SD) compared to blebbistatin-treated cells (red, n=5  
528 cells). E) Representative images during Latrunculin A and subsequent washout experiment visualized by live  
529 TIRFM (green: GFP- $\beta$ II-spectrin, magenta: RFP-actin). Kymographs are generated in correspondence of  
530 dashed yellow line and rectangle respectively (scale and time bars are shown). F) The same experimental  
531 protocol is repeated with the drug blebbistatin and representative images are shown (green: GFP- $\beta$ II-  
532 spectrin, magenta: RFP-myosin light chain). Kymograph generated in correspondence of dashed yellow box.  
533 Similar to endogenous actin nodes formation during spreading, coordinated motion is observed during the  
534 drug and washout treatments between the two channels, in absence of colocalization (time scale and scale  
535 bar are reported in the kymograph).

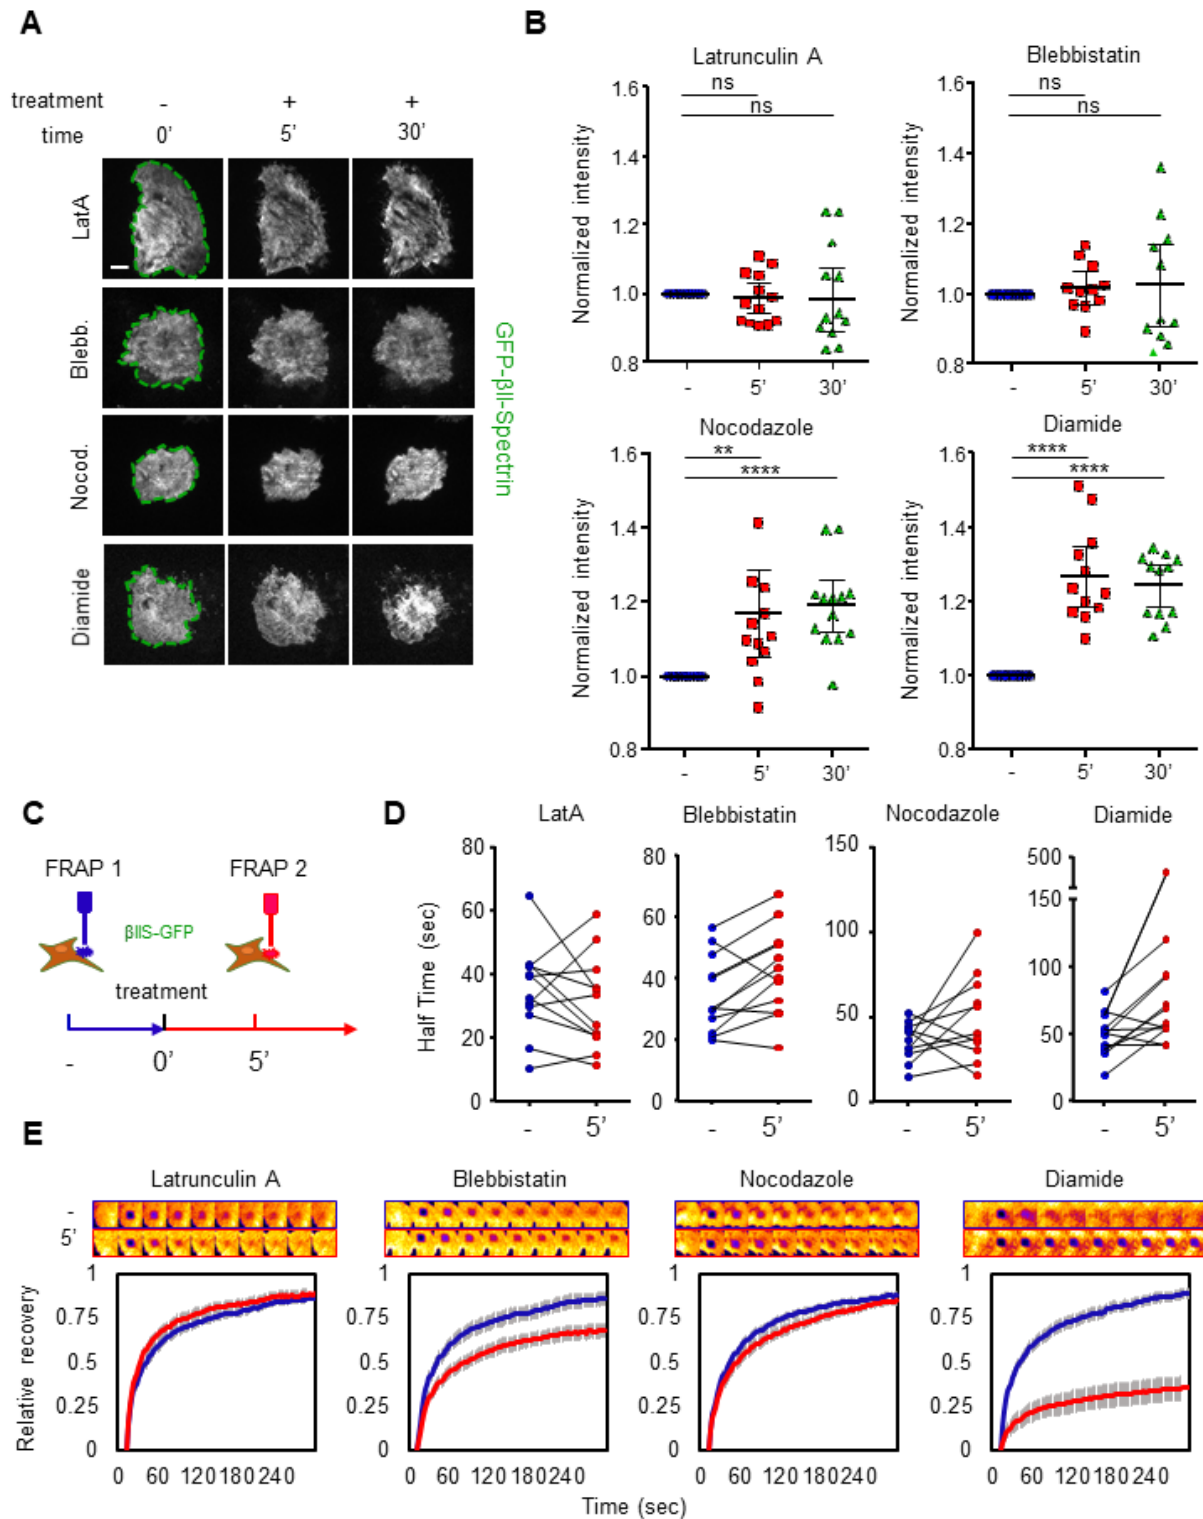

536  
537

**Figure 4.  $\beta$ II-Spectrin turnover relies on Myosin II-dependent contractility**

538 A) GFP- $\beta$ II-spectrin expressing MEFs imaged by live TIRFM during the administration of cytoskeletal  
 539 impairing drugs are shown before (-) and during (+) the treatments (scale bar: 20  $\mu$ m). Whole-cell mean  
 540 fluorescence intensities are normalized to the pre-treatment frames (blue circles), and plotted in B at 5

541 minutes (red square) and 30 minutes (green triangle) of treatment (n=12 cells, mean±SD, paired T-test:  
542 \*\*\*\*p<0.0001, \*\*p<0.01). C) Schematic representation of the dual-FRAP assay of GFP-βII-spectrin  
543 expressing MEFs, performed before (blue) and after 5 minutes of treatment (red). The resulting half-time  
544 recoveries are presented in D (individual cell connected by the black lines). Averaged half-time recoveries  
545 resulting from the single exponential fitting: latrunculin A treatment from 34.9 (-) to 27.2 (5') seconds,  
546 blebbistatin from 34.5 to 40.1 seconds, nocodazole from 35.4 to 46.1 seconds and diamide from 38.4 to  
547 48.2 seconds. E) Recovery curves are plotted (n=12-20 cells, mean±SEM), while the top panels show  
548 representative ROIs during the recovery phase. Mobile fractions (%) are derived from the curves: during  
549 latrunculin A treatment increased from 82.9% to 85.3%, blebbistatin decreased from 83.7% to 66.7%,  
550 nocodazole decreased from 85.1% to 82.6% and diamide treatment decreased from 85.6% to 34.5%  
551 (mean±SEM are presented in FRAP graphs to visualize the accuracy of the means subjected to the fitting  
552 procedure. See supplemental information for fitting parameters).

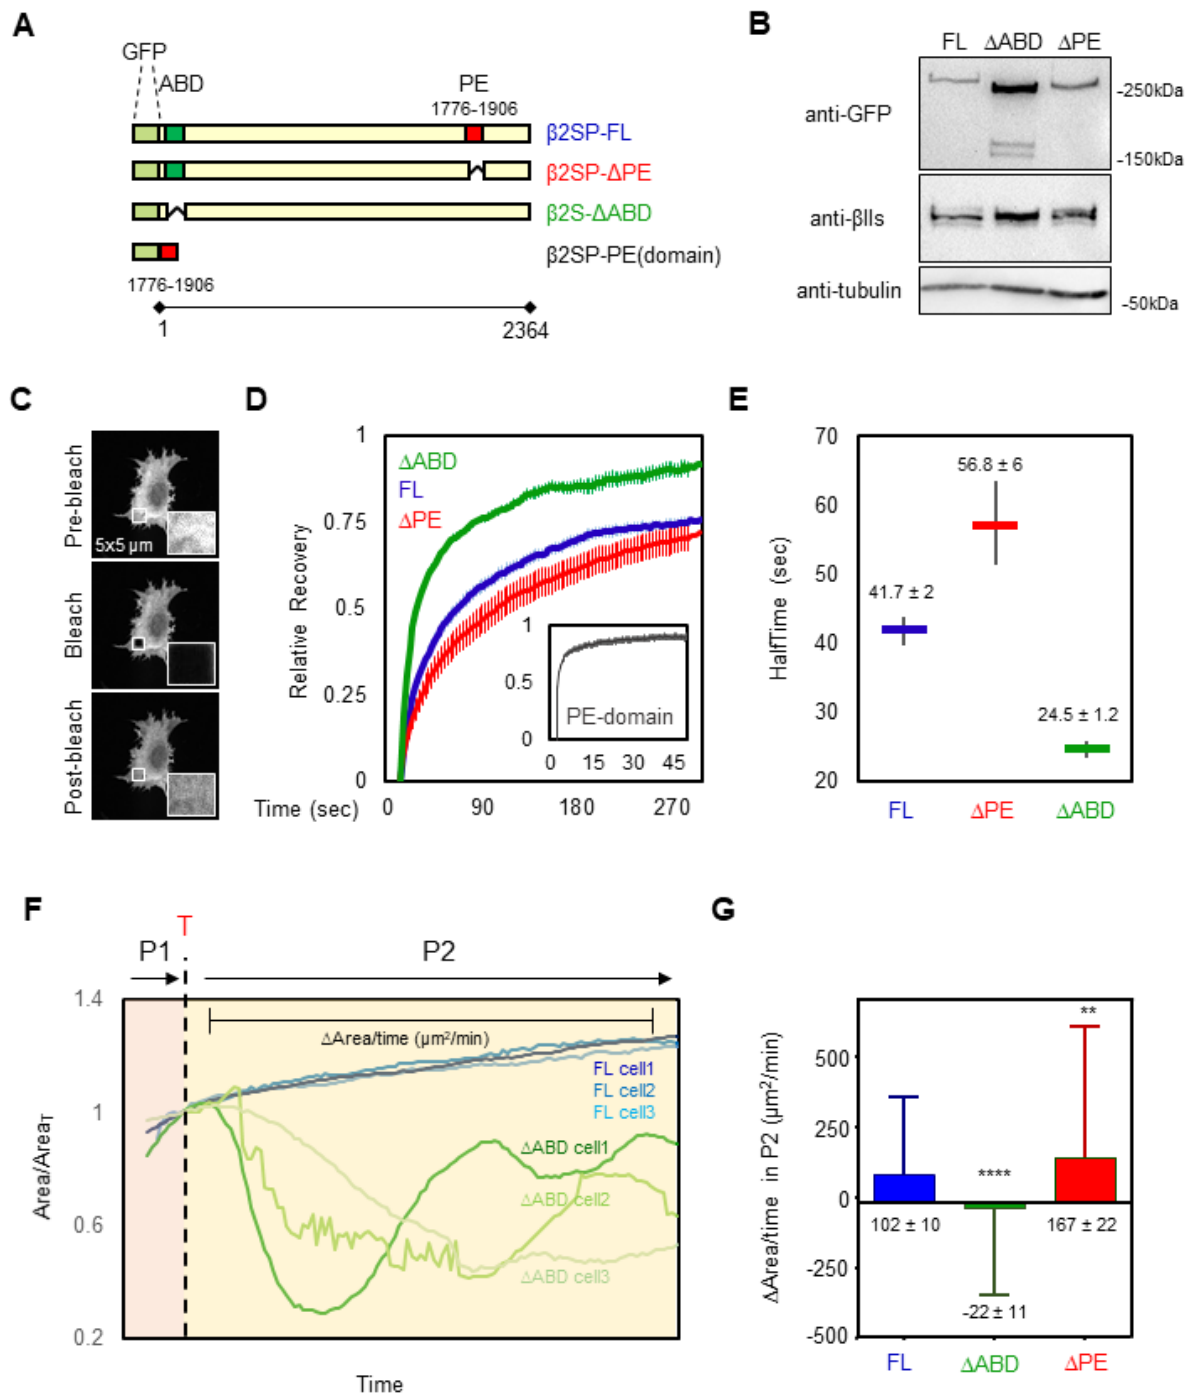

553  
554

**Figure 5.  $\beta$ II-Spectrin variants show different dynamics and properties during cell spreading**

555 A) Cartoon representation of the  $\beta$ II-spectrin deletion mutants analyzed in this study. B) Total cell lysates of  
556 MEFs expressing exogenous GFP- $\beta$ II-spectrin variants analyzed by anti-GFP and anti- $\beta$ II-spectrin antibodies  
557 in western blot assay. C-D) FRAP assay of the  $\beta$ II-spectrin deletion mutants expressed in MEFs. The fit to a

558 single exponential equation is shown (n= 15-20 cells, mean±SEM), and the resulting half time recoveries are  
559 plotted in E (mean±95% confidence interval). Full-length protein displays 74.8% of mobile fraction and half  
560 time recovery of 41.7 seconds,  $\Delta$ ABD 87.2% mobility and 24.5 seconds recovery and  $\Delta$ PE 73.2% and 56.8  
561 seconds. PE-domain only resulted in 87% mobility and 1.45 seconds recovery (inset). F) Normalized cell area  
562 growth during P2: three stereotypical MEFs transfected with GFP- $\beta$ II-spectrin FL are plotted in blue, while  
563 MEFs expressing  $\Delta$ ABD are shown in green and followed for 10 minutes after P1/P2 transition (T) by live  
564 TIRFM. G) Quantification of  $\Delta$ Area/time extracted from each frame of time-lapses during 10 minutes after  
565 transition into P2 (FL n=792 frames,  $\Delta$ ABD n=840 frames,  $\Delta$ PE n= 502 frames, 7-9 cells. Mean±SD, one-way  
566 Anova statistical analysis with multiple comparison, \*\*p<0.008 \*\*\*\*p<0.0001).

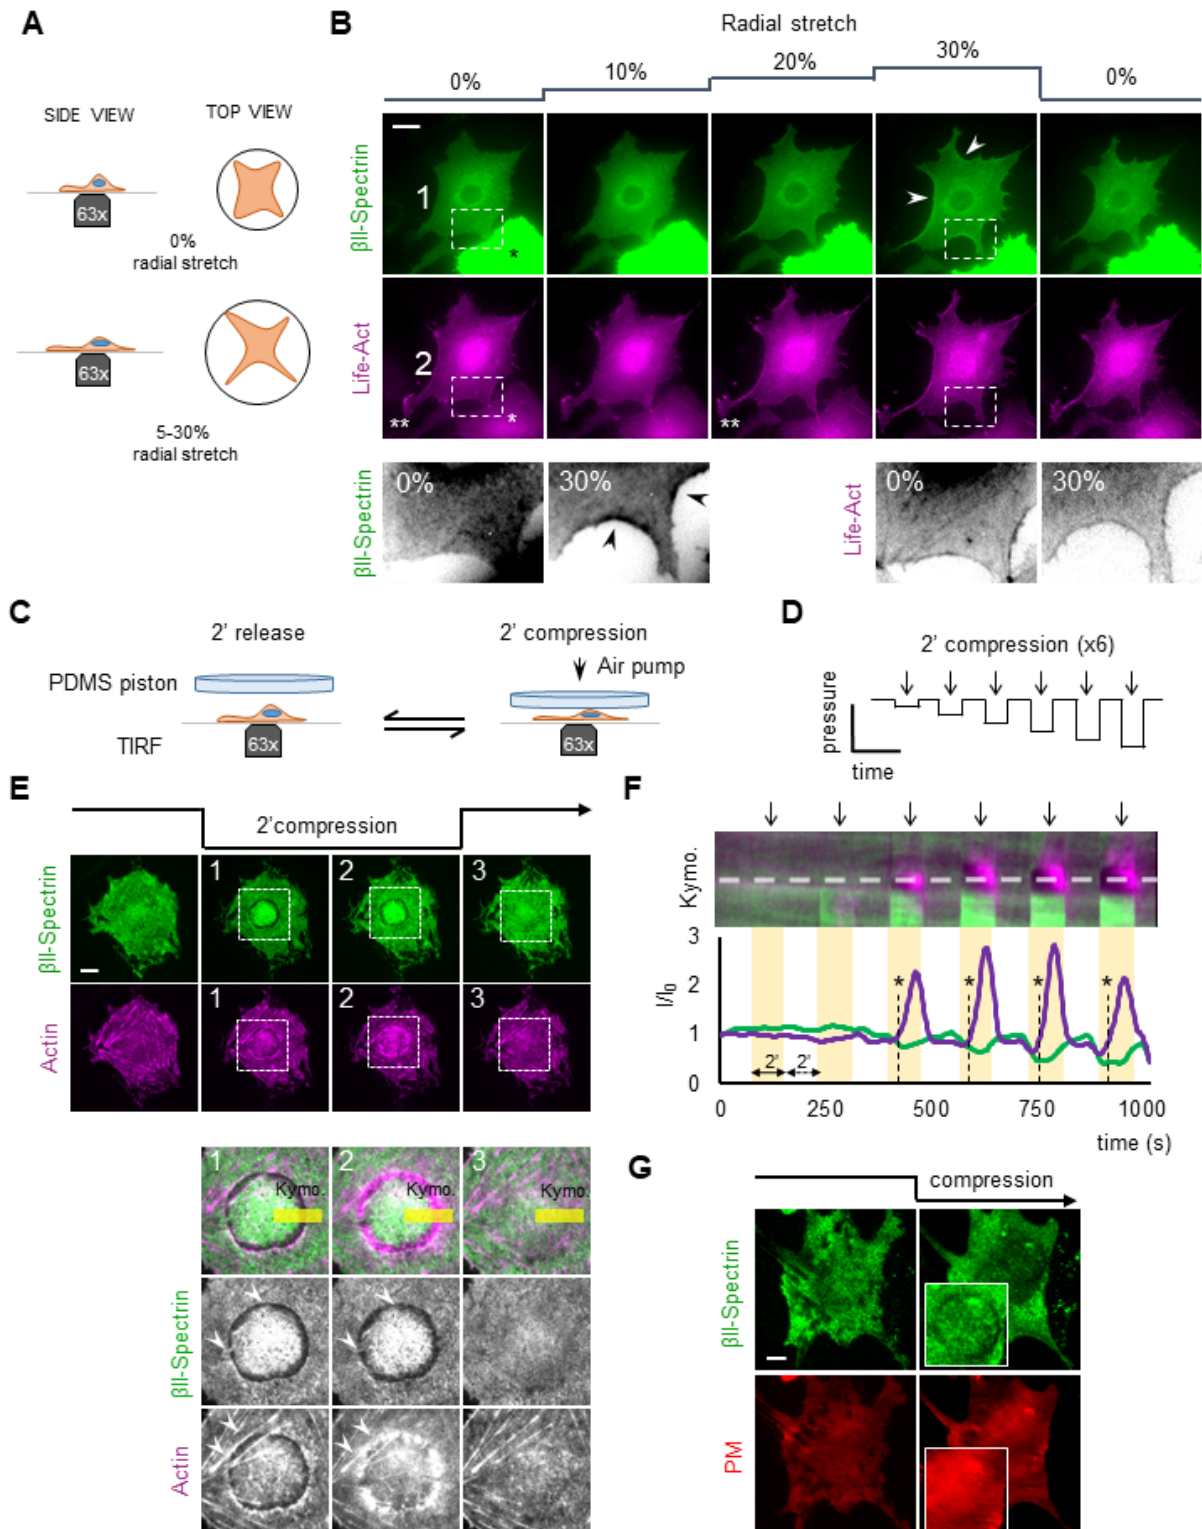

567  
568

**Figure 6.  $\beta$ II-Spectrin reactions to mechanical perturbations highlight the interplay with Actin**

569 A) Cartoon representation of the cell stretching device implemented in this study. B) MEFs transfected with  
570 GFP- $\beta$ II-spectrin (green) and LifeAct-RFP (magenta) seeded on the fibronectin-coated silicone membrane  
571 and stretched bi-axially (0-30%) during live EPI fluorescence imaging (white asterisk indicates transfected

572 MEFs with high intensities excluded from the analysis, scale bar: 20  $\mu$ m). Double white asterisks highlight a  
573 lamellipodia blocked during the stretching. In the dashed boxes 1-2, representative cell edge behavior  
574 observed among independent experiments, highlighting peculiar condensation of  $\beta$ II-spectrin in curvature  
575 zones not enriched by actin (arrowheads) at the maximal stretch (30%). C-D) Cell compression set-up and  
576 the applied step-increase protocol are schematized. E) GFP- $\beta$ II-spectrin (green) and RFP-actin (magenta)  
577 expressing MEFs are imaged by live TIRFM during the entire compressive protocol. Four relevant time  
578 points are shown: pre-compression, early and late compression, and during the release phase (scale bar: 10  
579  $\mu$ m). Key details consistently observed between independent experiments are highlighted by dashed boxes  
580 and are zoomed in panel 1-2-3. The reaction in correspondence of the nuclear edge, brought into the TIRF  
581 plane by the compressive stress (white arrowheads), is quantified by the kymograph analysis (F) over the  
582 yellow rectangle. Fluorescence intensities across the dashed line in F are plotted in the graph; clearance of  
583  $\beta$ II-spectrin and the delayed actin polymerization is observed (asterisks and dashed lines in the graph). G)  
584 Control cells expressing PM-marker (red) and  $\beta$ II-spectrin (green) are subjected to the same  
585 compression/relaxation protocol. Insets focused on the cortex underneath the nucleus, where PM-marker  
586 retains its continuity (scale bar: 10 $\mu$ m).



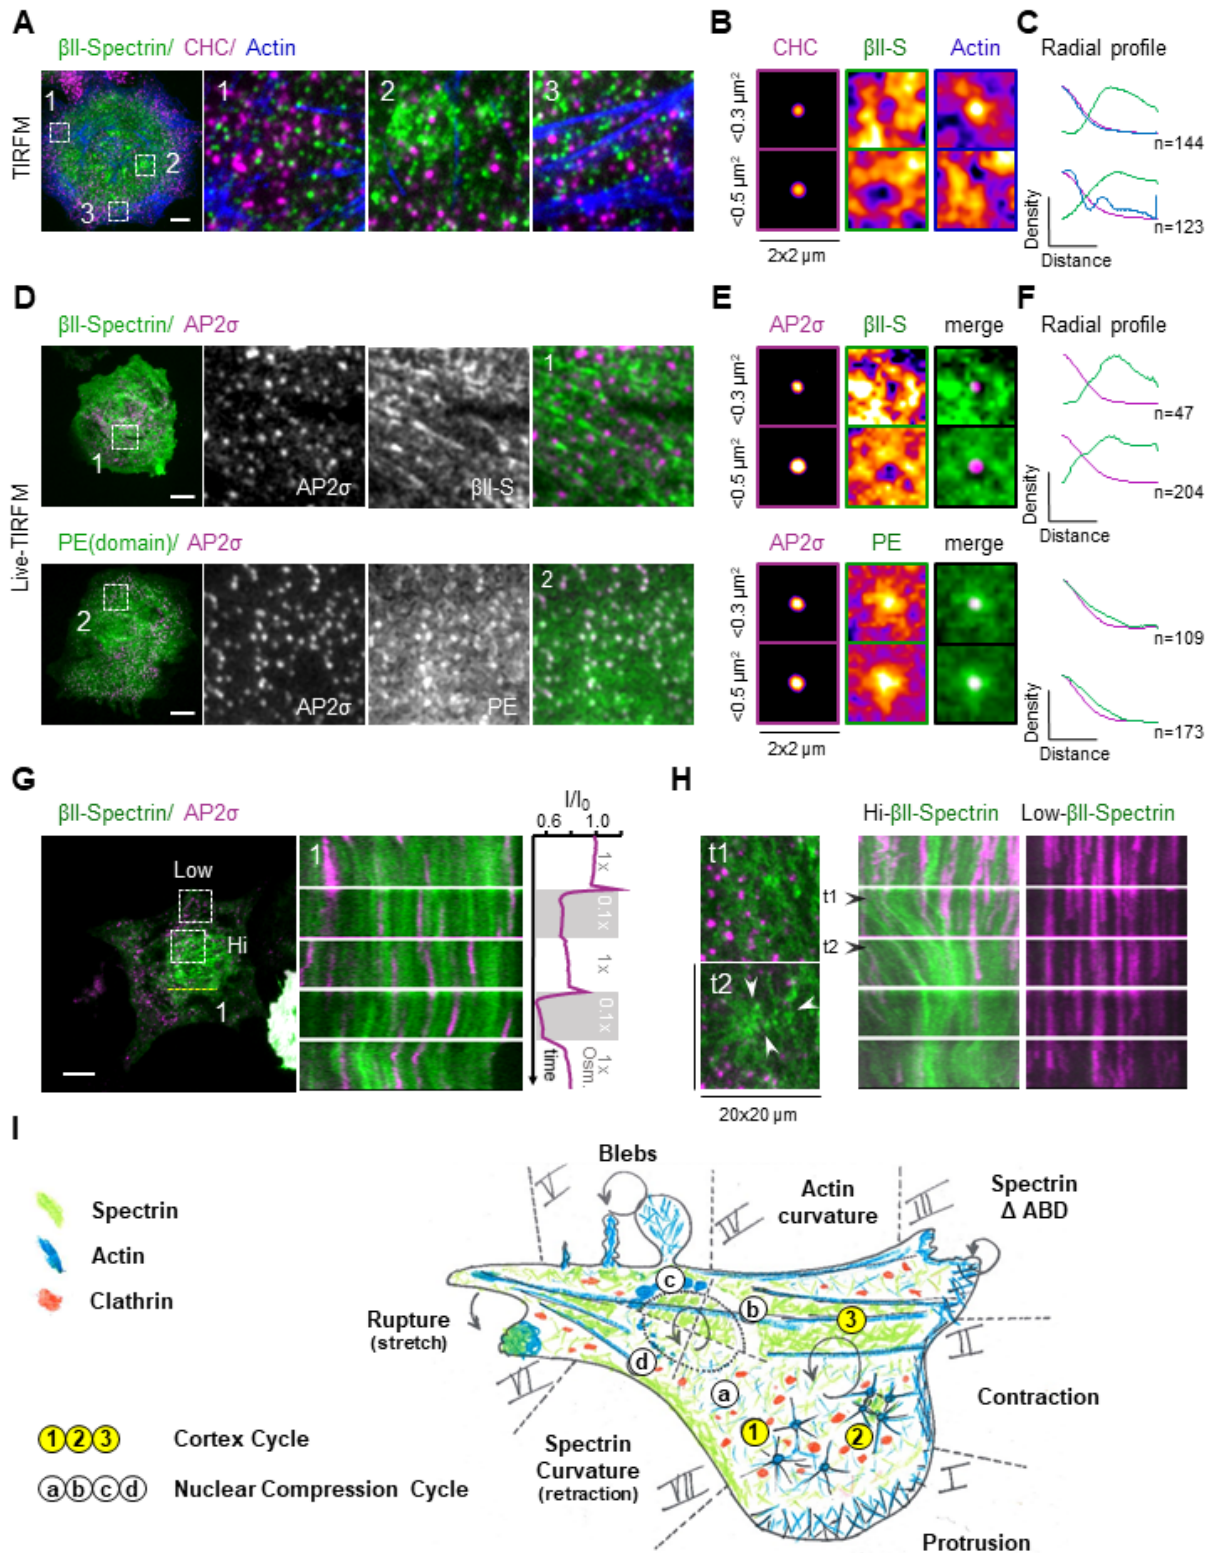

587  
588

**Figure 7. Clathrin Endocytosis dynamic integration in the spectrin/actin/plasma membrane composite**

589 A) TIRF microscopy images of MEFs immunostained for endogenous  $\beta$ II-spectrin (green), clathrin heavy  
590 chain (CHC, magenta) and F-actin (blue, scale bar: 10  $\mu$ m). Three different subcellular regions are  
591 highlighted (dashed boxes 1-3): high-density CHC zone (1),  $\beta$ II-spectrin-rich zone (2) and actin stress fibers



592 (3). B) Density maps generated by aligning discrete clathrin pits of small ( $<0.3 \mu\text{m}^2$ ,  $n=144$ ) and larger size  
593 ( $0.3-0.5 \mu\text{m}^2$ ,  $n=123$ ) are shown, while in C the correspondent radial density profiles for the three channels  
594 are presented. D) Representative live TIRF microscopy images of MEFs transfected with GFP- $\beta$ II-spectrin  
595 (green) and the clathrin adapter AP2 $\sigma$ -mCherry (magenta) (scale bar:  $10 \mu\text{m}$ ), Unsharp and Gaussian filters  
596 were applied. PE-only domain transfected fibroblasts show homogeneous PM localization and enrichment  
597 in correspondence of AP2 $\sigma$  pits, as shown by density maps (E) and radial profile analysis (F) generated as  
598 previously described (GFP- $\beta$ II-spectrin:  $<0.3 \mu\text{m}^2$ ,  $n=47$  and  $0.3-0.5 \mu\text{m}^2$ ,  $n=204$ ; PE-domain:  $<0.3 \mu\text{m}^2$ ,  
599  $n=109$  and  $0.3-0.5 \mu\text{m}^2$ ,  $n=173$ ). G) Representative time-lapse TIRFM images during osmotic shocks:  
600 kymograph is generated in correspondence of the dashed yellow line (1), where spectrin mesh and AP2 $\sigma$   
601 pits display coordinated lateral motion in response to osmolarity changes. Whole-cell AP2 intensity signal in  
602 response to the osmotic shocks is plotted in the graph (vertical plot). H)  $20 \times 20 \mu\text{m}$  ROIs are drawn at low-  
603 and high-spectrin density zones around AP2 pits (correspondent to dashed boxes in G, only zooms of Hi-  
604 density zone are reported at two different frames). Kymographs display the differential behavior of the pits  
605 observed during spectrin remodeling.

606 (I) Model resuming our findings on the dynamic response of spectrin during mechanoresponse. (I) to (VII)  
607 highlight the cell edge behavior. (I) In cell protrusions actin polymerization dominates. (II) During  
608 contraction, actin is condensed and forms transverse arcs. In I and II spectrin is secluded and “passively”  
609 follow acto-myosin lead. (III) Deletion of the Actin binding domain of spectrin induces edge instability upon  
610 contractility activation. (IV) Mature actin bundles sustain the PM, spectrin is not recruited to those actin  
611 curvatures. (V) Upon cell compression blebs enriched with actin but devoid of spectrin are formed. While  
612 actin polymerizes and condense in the bleb, spectrin localizes and marks the former position of the cell  
613 edge before compression. (VI) Abrupt cell detachment induces a “plug-like” formation in which actin and  
614 spectrin seem to colocalize. (VII) In actin depleted but spectrin-rich edge curvature, spectrin condenses as  
615 the edge move inward, potentially holding the PM and responding to the increased membrane load. (a) to  
616 (d) highlight the cell cortex behavior under compressive stress. (a) to (b) The native acto-spectrin cortex  
617 gets cleared under the edge of the nuclear envelope upon compression. (c) During compression, in this gap  
618 of the cleared membrane, actin polymerization occurs and covers progressively the bare bilayer. (d) Upon  
619 relaxation, spectrin meshwork elastically recoils, entangling the polymerizing actin and restoring the  
620 original cortex organization. Stress fibers under the nucleus are not affected by the compression. (1) to (3)  
621 highlight the non-perturbed cell cortex behavior. (1) In spectrin-less zones, actin nodes can form. (2) These  
622 aster-like structures move and coalesce upon myosin II-mediated contractility. This mechanism  
623 synchronously modifies the local density of the spectrin meshwork, with expansion and condensation  
624 between coalescing nodes. Further acto-myosin condensation lead to bundles formation interleaved by  
625 spectrin-rich territories. (3) These high-density zones impede clathrin-mediated endocytosis (red dots),  
626 which otherwise occurs between spectrin fences. Those steps occur cyclically upon cell control or  
627 drugs/mechanical stimuli.

628

629 **Extended data**

630 **Movie 1** Fibroblast spreading assay: cell edge analysis of GFP- $\beta$ II-spectrin and RFP-Actin

631 **Movie 2** Fibroblast spreading assay: PIV analysis of GFP- $\beta$ II-spectrin and RFP-Actin flows

632 **Movie 3** Actin and  $\beta$ II-spectrin dynamics during Latrunculin A and Blebbistatin washout experiments

633 **Movie 4** Differential  $\beta$ II-spectrin deletion mutants' behavior during spreading

634 **Movie 5**  $\beta$ II-spectrin- $\Delta$ ABD displays edge instability during spreading

635 **Movie 6** Cell compression assay

636 **Movie 7** Meso-scale dynamic of GFP- $\beta$ II-spectrin and mCherry-AP2 during osmotic shocks

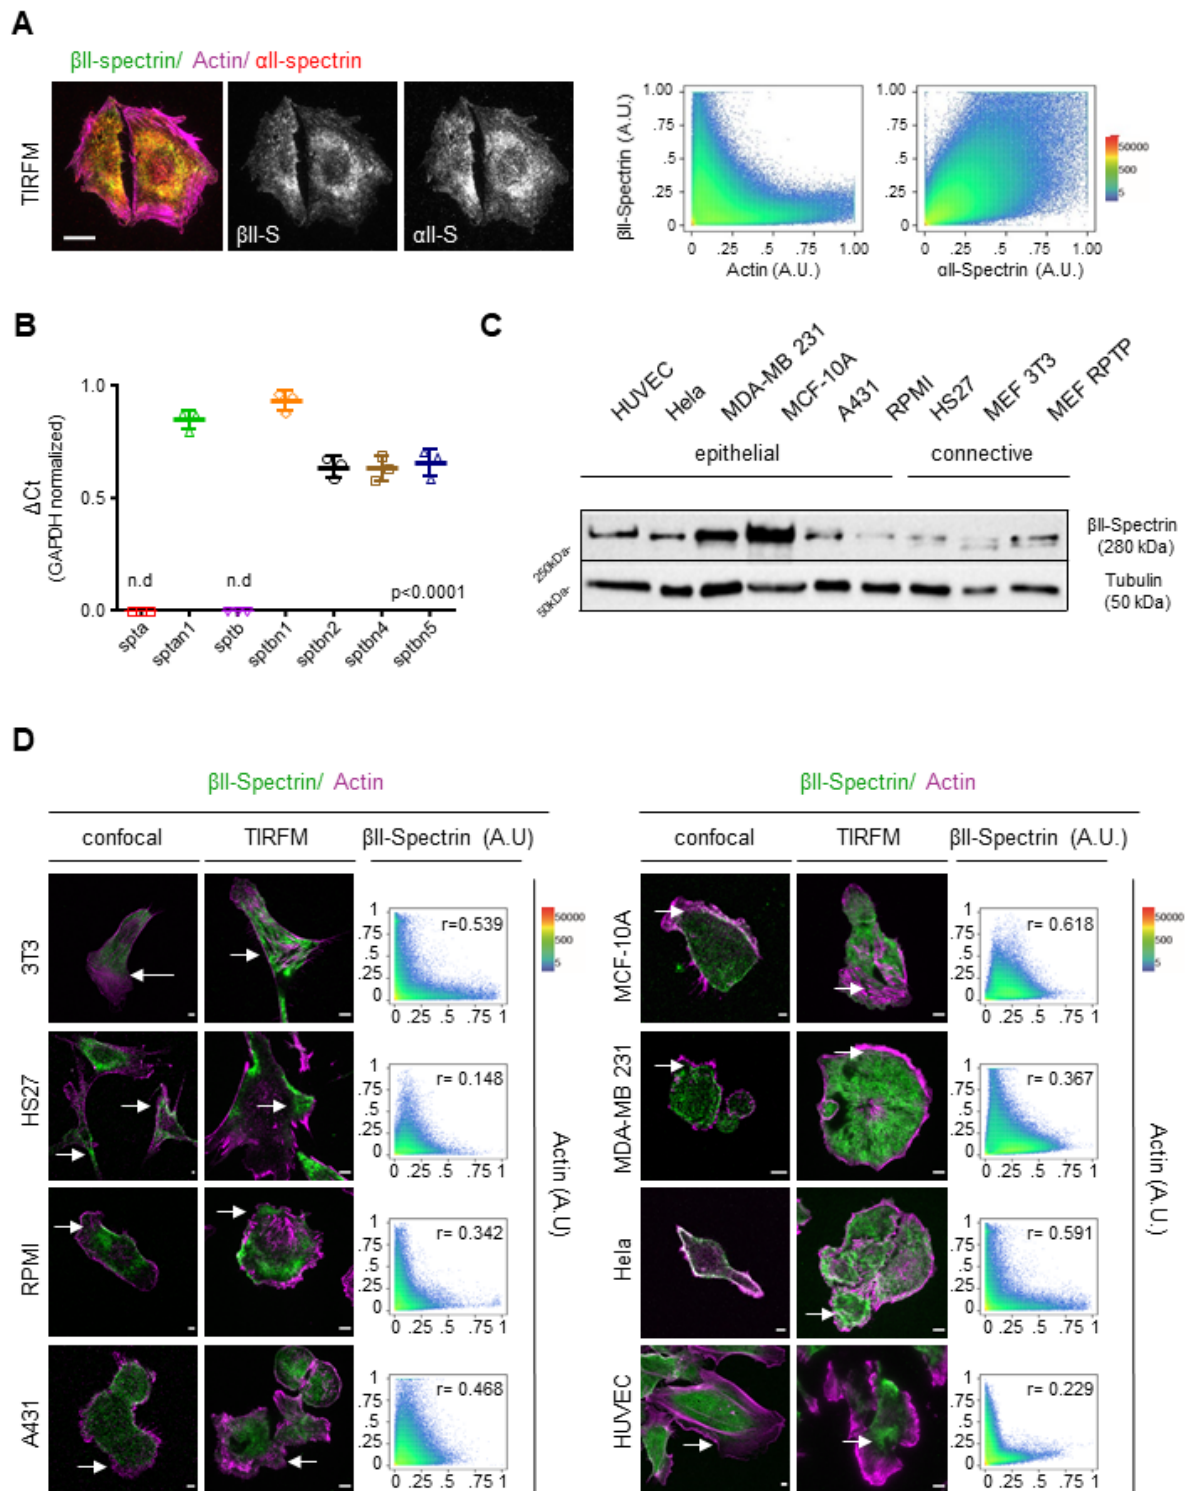

637  
638

**Figure S1.  $\beta$ II-Spectrin/Actin complementarity is observed in multiple cell lines by different backgrounds**

639 A) Representative images of MEFs immunostained for  $\beta$ II-spectrin (green),  $\alpha$ II-spectrin (red) and F-actin  
640 (magenta), visualized by TIRFM (scale bar: 10  $\mu$ m). Correlation analysis of pixel intensities between the  
641 different channels is reported in the two scatter plots. B) Gene expression analysis of different spectrin

642 isoforms in MEFs used for this study, measured by qPCR (n=3, n.d.=not detected, Statistical analysis: one-  
643 way ANOVA with multiple comparisons,  $p < 0.0001$ ). The genes *sptan1* and *sptbn1* encode for  $\alpha$ II and  $\beta$ II  
644 spectrin respectively. C)  $\beta$ II-spectrin protein expression in different cell lines analyzed by western blot in  
645 total cell lysates. D) Different cell lines were immunostained for F-actin (magenta) and endogenous  $\beta$ II-  
646 spectrin (green). Confocal and TIRFM images are presented, arrows indicate peculiar complementary zones  
647 (scale bar: 10  $\mu$ m). Cross-correlation analysis by scatter plot between the two channels and Pearson's  
648 correlation coefficients are reported for TIRFM images.

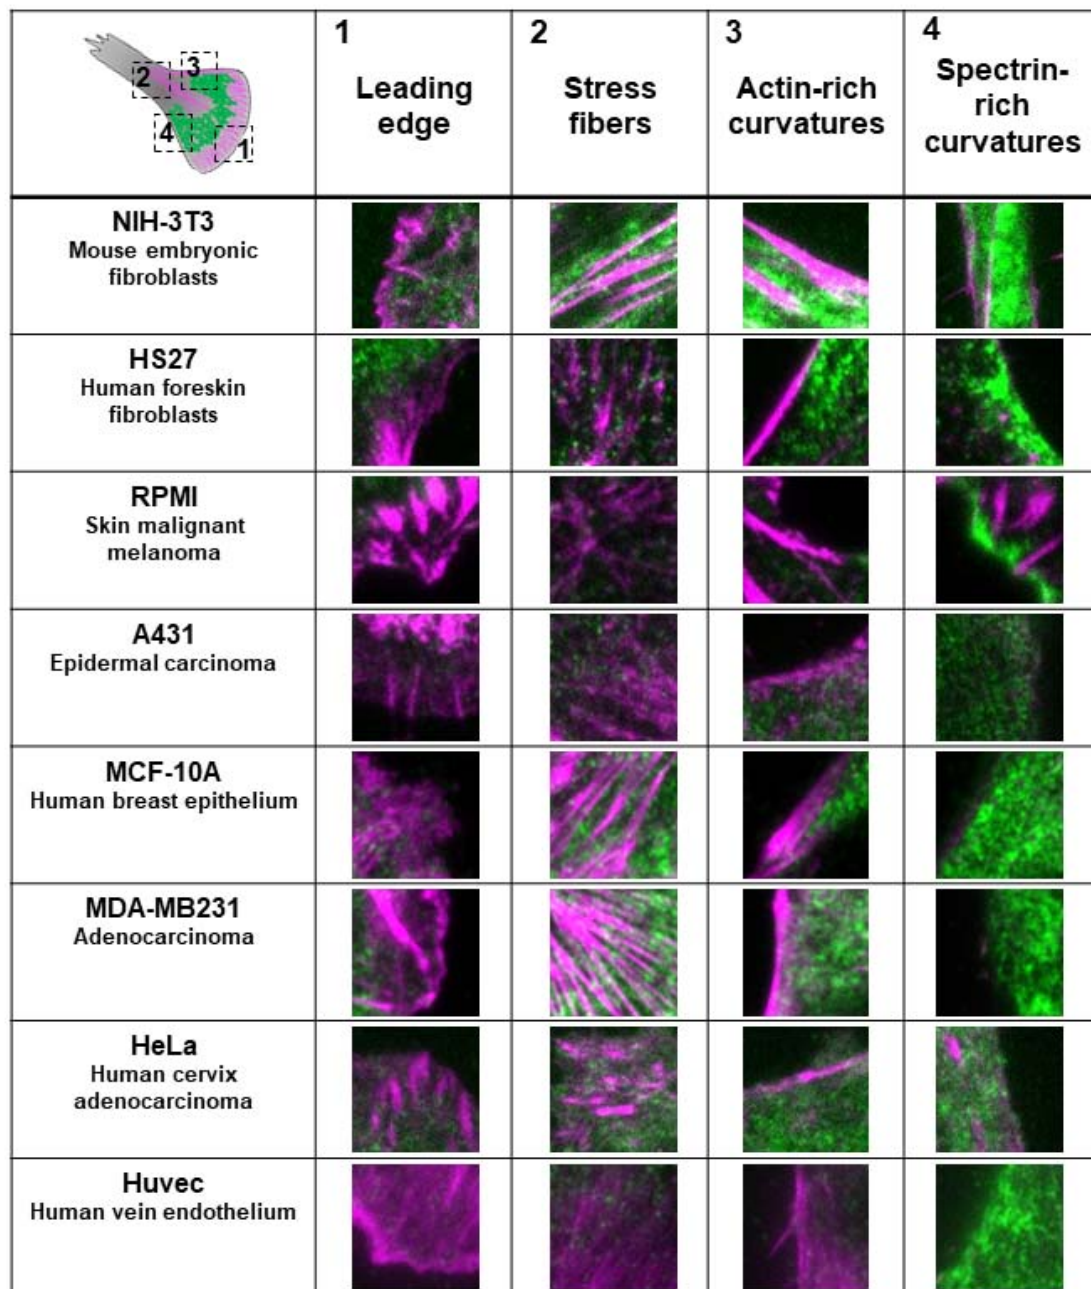

649

650

**Figure S2. Zooms of  $\beta$ II-Spectrin and Actin complementary territories**

651

TIRFM images ( $2 \times 2 \mu\text{m}$ ) of the different cell lines immunostained for endogenous  $\beta$ II-spectrin (green) and F-actin (magenta). Cell zones (as listed in Figure 1 A for MEFs) highlighting  $\beta$ II-spectrin/actin complementarity are reported.

652

653

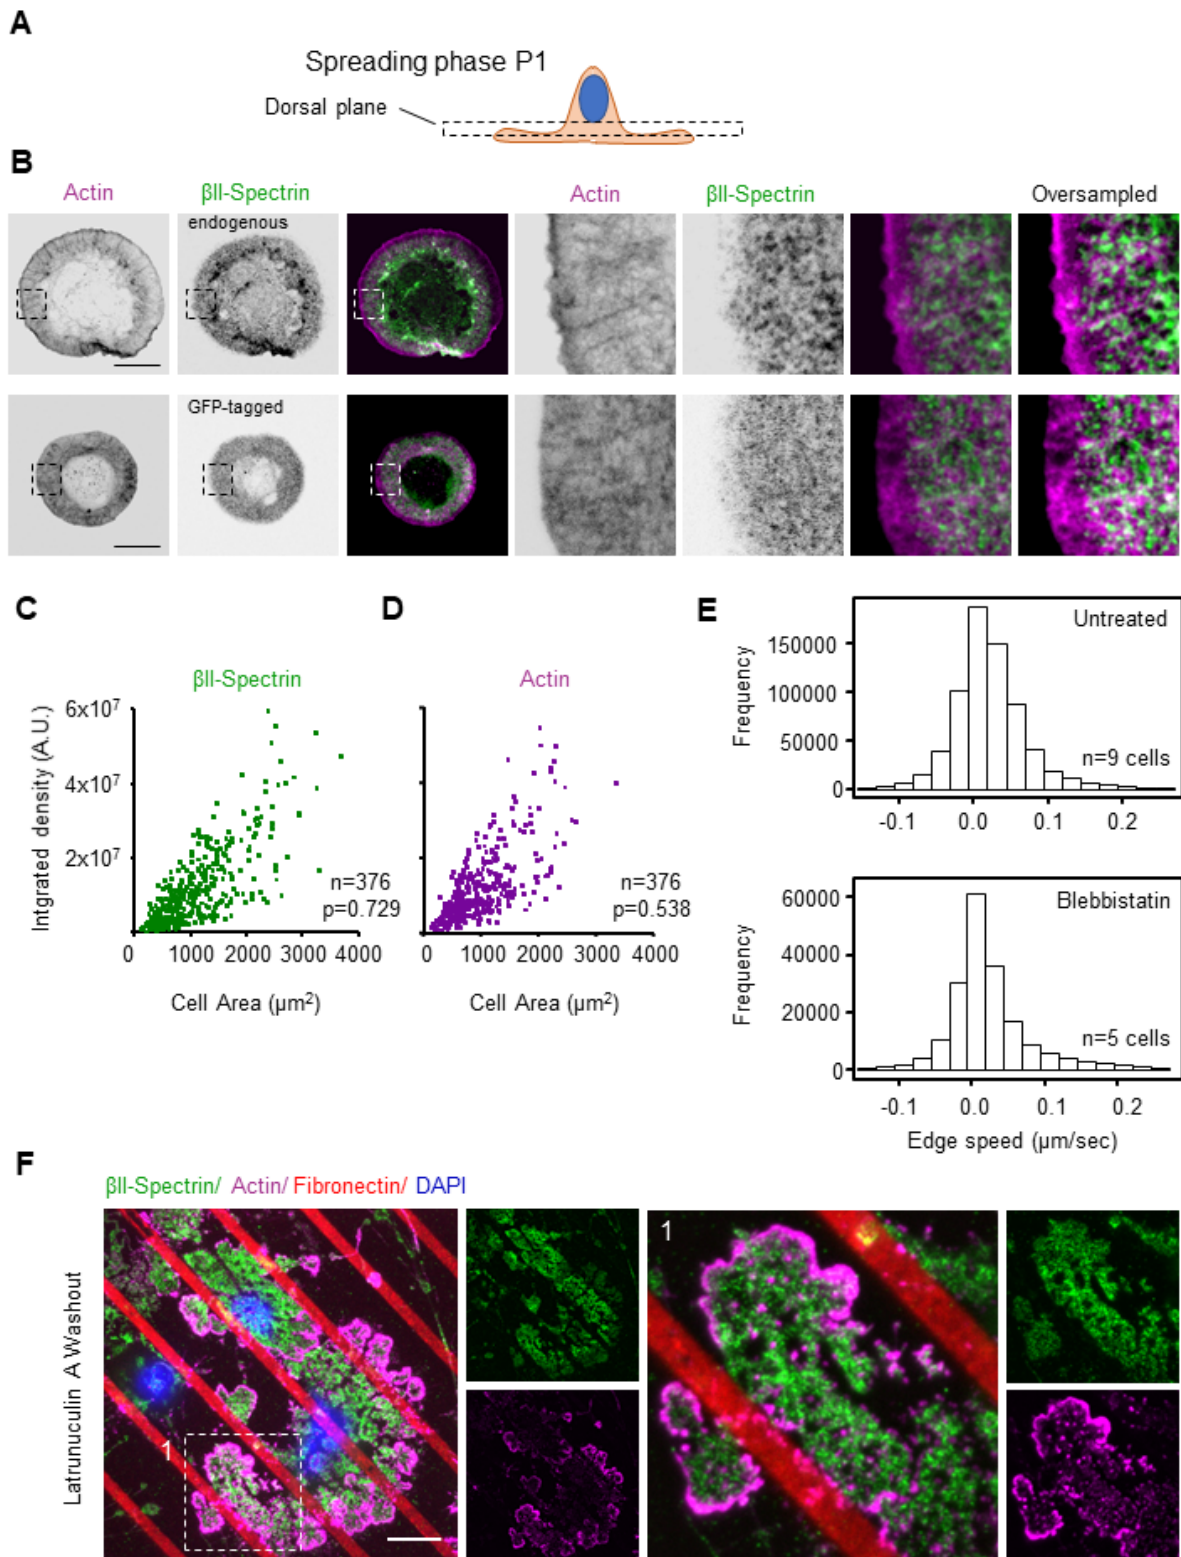

654  
655  
656

**Figure S3.  $\beta$ II-Spectrin organization in P1;  $\beta$ II-Spectrin/area relationship during spreading;  $\beta$ II-Spectrin and Actin recovery after LatA washout in cortex-mimicry zones**

657 A-B) MEFs fixed during P1, immunolabelled for endogenous F-actin (magenta) and  $\beta$ II-spectrin (green,  
658 endogenous and GFP-tagged), and analyzed by 3D confocal microscopy. Optical sectioning is optimized to

659 resolve the cortex on the cell dorsal plane during P1, as shown in the cartoon (scale bar: 20  $\mu\text{m}$ ). C-D) Cells  
660 fixed at different time points after seeding (between 5-20 minutes) and immunolabelled for endogenous  
661  $\beta$ II-spectrin and F-actin. Projected cell area and fluorescence integrated intensities in TIRFM for the two  
662 proteins are reported, displaying linear correlation ( $n=376$  cells, see Extended Table 1). E-F) Total data point  
663 distribution of the graphs displayed in Figure 2E and 2G, outliers were excluded from the analysis  
664 (threshold 0.0007; untreated:  $n=9$  cells; blebbistatin:  $n=5$  cells). Both analyses showed Gaussian normal  
665 distribution between the physiological speed range of  $-0.1 \mu\text{m}/\text{sec}$  and  $+200 \mu\text{m}/\text{sec}$ . F) MEFs seeded on  
666 micropatterned fibronectin-coated lines. TIRFM images of cells fixed during the washout phase after  
667 Latrunculin A treatment are shown (green:  $\beta$ II-spectrin, magenta: F-actin, red: fibronectin. Scale bar: 20  
668  $\mu\text{m}$ ). DAPI (blue) is visualized in EPI mode to discriminate intact cells from debris. The white dashed box (1)  
669 is zoomed to highlight peculiar actin nodes formation in the non-adhesive cell cortex.



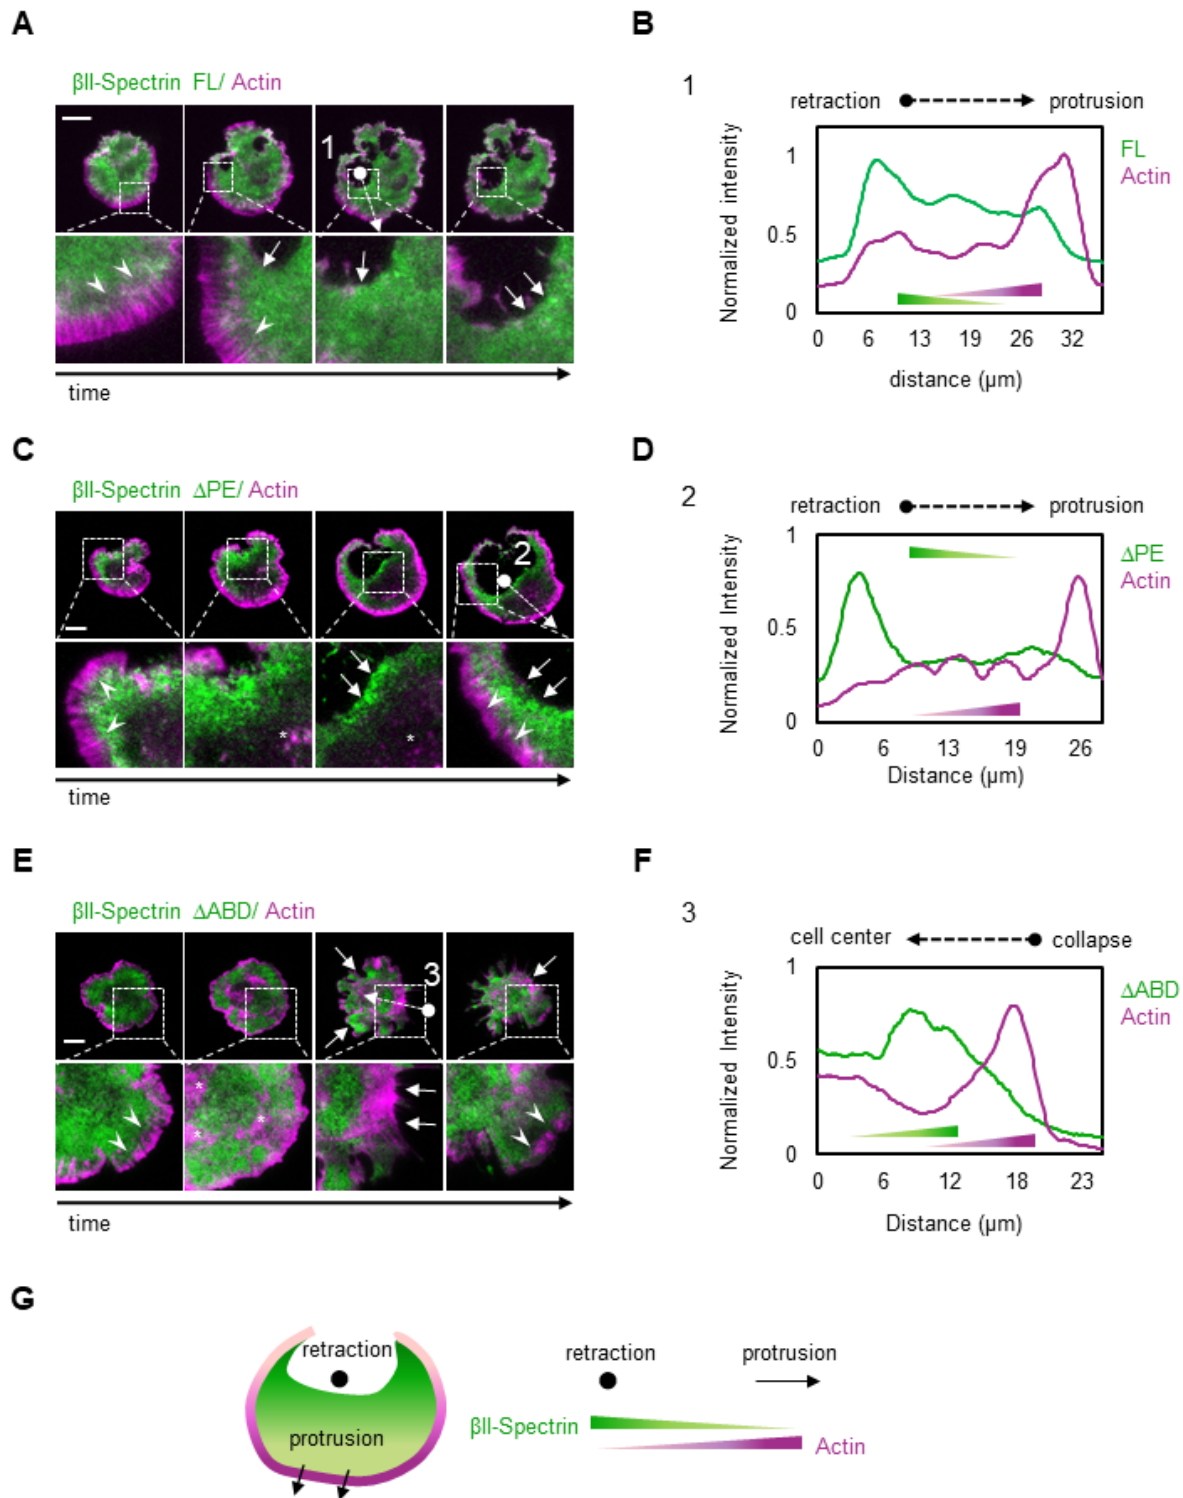

670  
671  
672

**Figure S4.  $\beta$ II-Spectrin FL,  $\Delta$ PE and  $\Delta$ ABD accumulate at “cracking” zones that spontaneously form during cell spreading/polarization**

673  
674

A-C-E) Representative images of spontaneous retractile events observed in MEFs expressing GFP- $\beta$ II-spectrin variants during cell spreading by live TIRFM (GFP- $\beta$ II-spectrin variants in green and RFP-Actin in



675 magenta, scale bar: 20  $\mu\text{m}$ ). Relevant events are highlighted by the dashed boxes and zoomed in the lower  
676 panels: protruding zones are indicated by white arrowheads, retracting zones by white arrows. Line scan  
677 analysis of arrows with circular ends (1-2-3) are reported in B-D-F for both proteins, directionality indicated  
678 by black arrows. G) Cartoon model of Actin/ $\beta$ II-spectrin opposite polarity during protrusion/retraction  
679 events during the polarization phase of cell spreading.

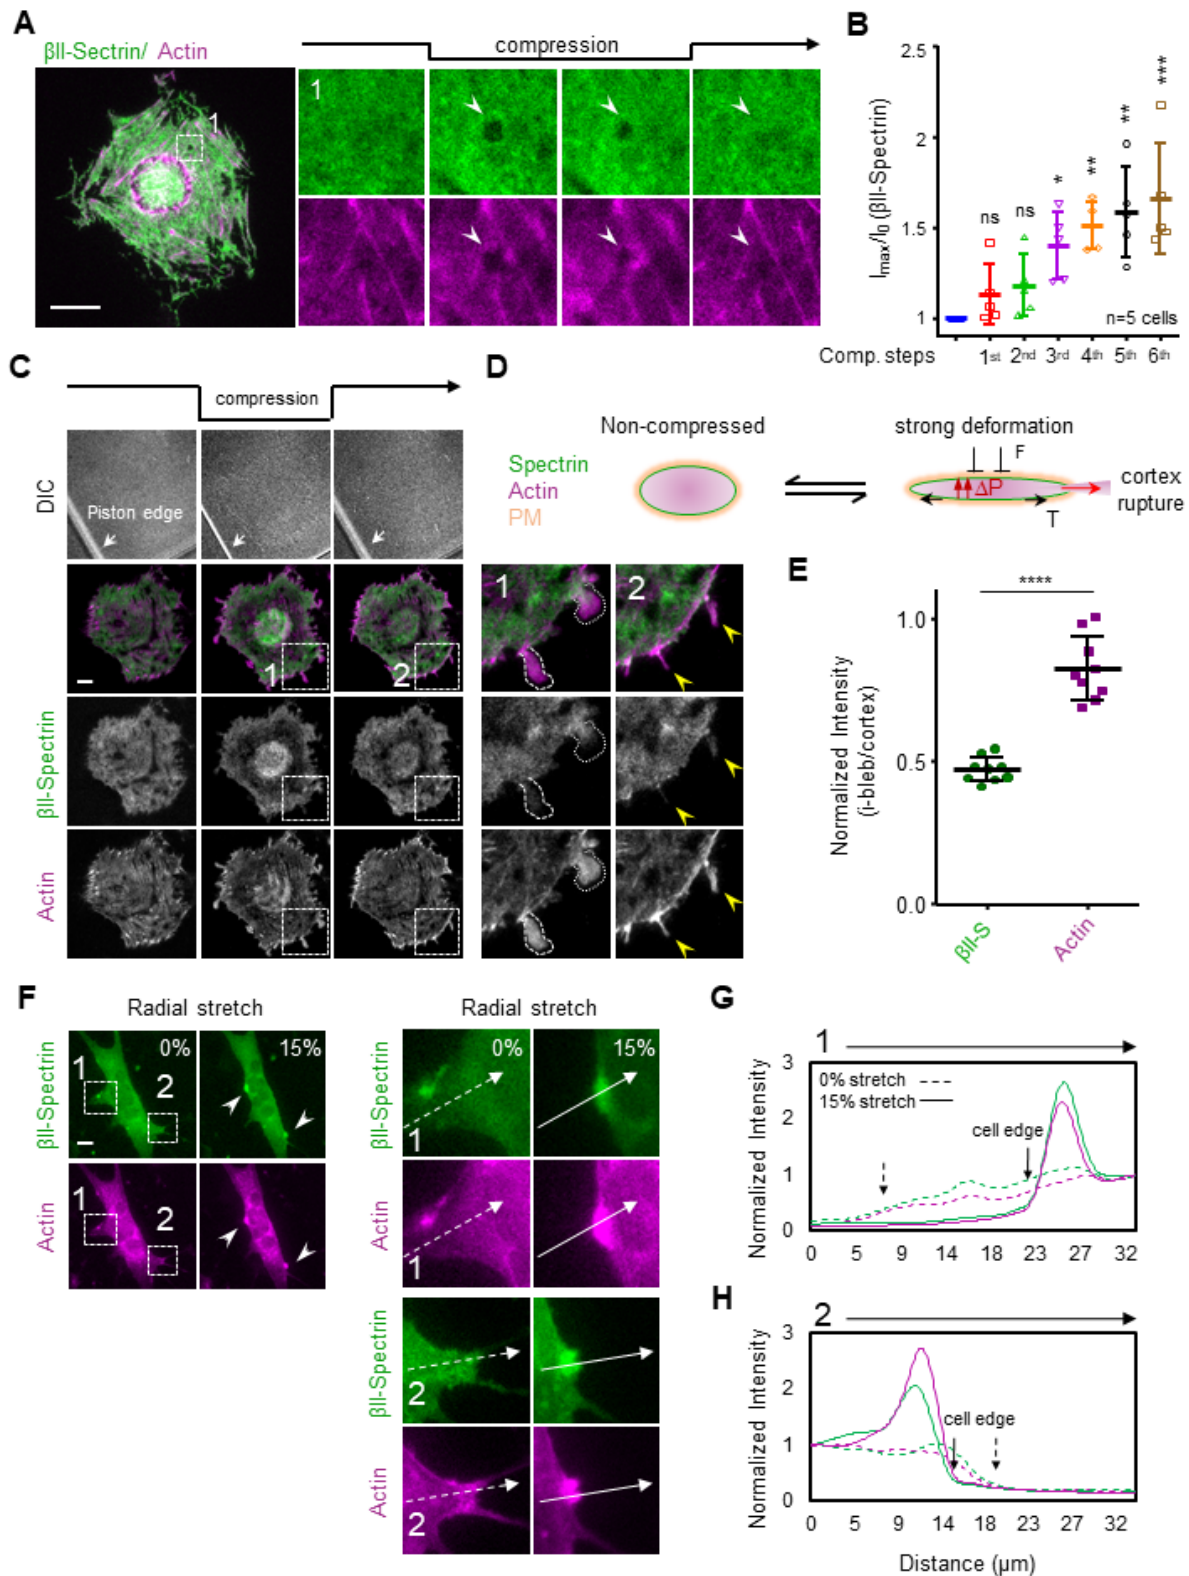

680  
681  
682

**Figure S5.  $\beta$ II-Spectrin reactions to mechanical perturbations highlight the interplay with Actin also in vesicles, blebs and collapsed protrusions**

683 A) The same cell presented in Figure 6 E is reported (scale bar: 20  $\mu$ m). Zoom 1 highlights the appearance of  
684 a vesicular structure (white arrowhead) upon compression, devoid of both  $\beta$ II-spectrin and actin,

685 resembling the clearance effect observed underneath the nucleus. B) Quantification of GFP- $\beta$ II-spectrin  
686 maximal intensity at the cell body during the sequential compression protocol, normalized to the pre-  
687 compression phase (n=5 cells, mean $\pm$ SD, one-way Anova with multiple comparisons \* p<0.05, \*\* p<0.005,  
688 \*\*\* p<0.0005). C) Maximal compression experiments of GFP- $\beta$ II-spectrin (green) and RFP-actin (magenta)  
689 expressing MEFs: compression stress is gradually increased until bleb formation is induced. Model of cortex  
690 rupture mechanism is schematized in D: key elements are the variation in intracellular pressure ( $\Delta P$ ) and  
691 cortex tension (T) during compression. Representative images are shown during (1) and upon release of  
692 compression (2), when induced blebs are resorbed into tubular-like actin enriched structures (yellow  
693 arrowheads). Actin and  $\beta$ II-spectrin content in the blebs compared to the adjacent cell body are quantified  
694 in E (n=9, mean $\pm$ SD in 3 independent experiments, unpaired T-test: \* p<0.0001). F) Bi-axial cell stretching  
695 experiment of GFP- $\beta$ II-spectrin (green) and RFP-actin (magenta) expressing MEFs, imaged by live EPI  
696 fluorescence microscopy. Dashed boxes 1 and 2 highlights two specific cell protrusions that detached upon  
697 15% stretch. Intensity profile across these processes (white dashed (0%) and full (15%) arrow) are plotted in  
698 G and H.

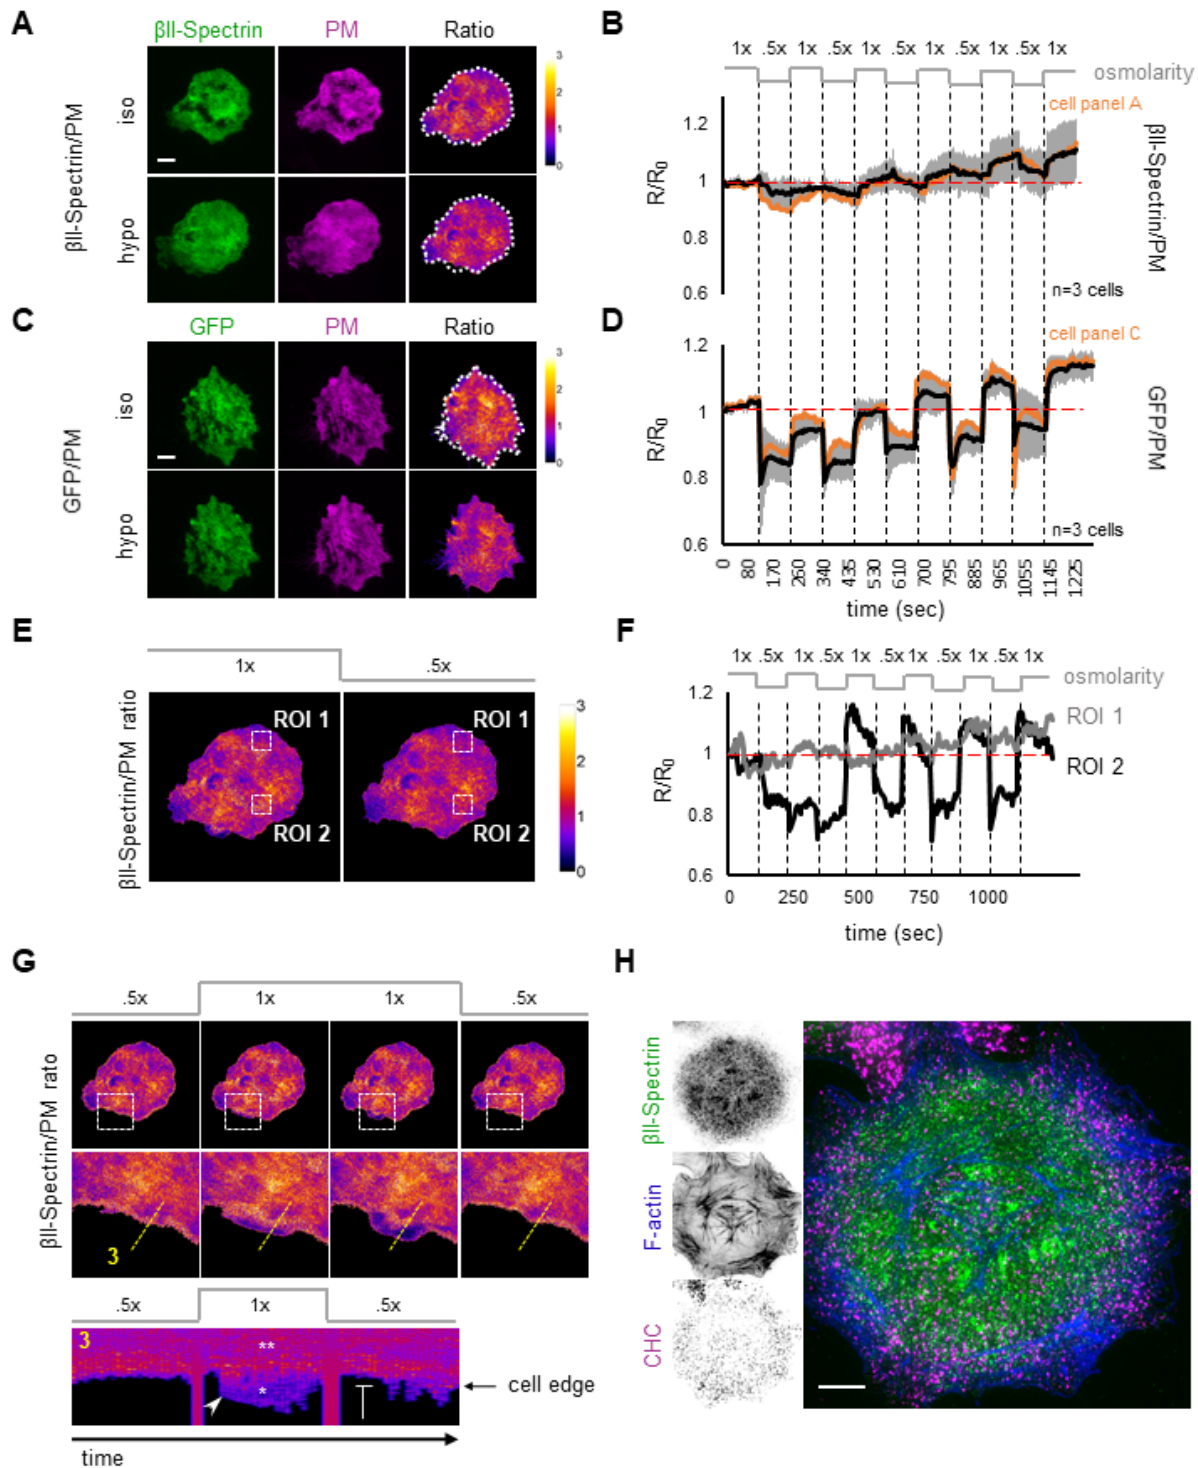

699  
700

**Figure S6.  $\beta$ II-Spectrin reactions to osmotic changes: global versus local behavior**

701 A) Representative images of GFP- $\beta$ II-spectrin (green) and PM-marker (magenta) transfected MEFs observed  
702 by live TIRFM during osmotic shocks. Five isotonic (1x)-to-hypotonic (0.5x) cycles were applied (B). Initial  
703 fluorescent signals are normalized to obtain the non-stoichiometric ratio  $\beta$ II-spectrin/PM (LUT fire, scale

704 bar: 10  $\mu$ m). The average ratio is plotted in B (black line, n=3 cells, mean $\pm$ SD), while the ratio of the cell in A  
705 is shown by the orange line. C-D) As a positive control, the same protocol is applied to MEFs transfected  
706 with soluble GFP (green) and PM-marker (magenta), while GFP/PM ratio is plotted in D (n=3 cells,  
707 mean $\pm$ SD). Zonal Ratio analysis at two extreme cases is reported in E: ROI1 presents high  $\beta$ II-spectrin/PM  
708 ratio, while ROI2 displays a lower ratio. As shown in the graph (F), the two ROIs behave differently: while  
709 ROI1 reacts similarly to the whole-cell analysis graph presented in B, ROI2 shows an initial decrease of the  
710 ratio sustained during the first two iso-to-hypotonic cycles, followed by a compensatory effect that  
711 restored the initial ratio during the last four cycles. A similar effect in a different PM zone is presented in G:  
712 lamellipodia (dashed box and zoomed in the bottom panel) characterized by high actin and low spectrin  
713 content are blocked during hypotonic shocks. Kymograph generated across the dashed yellow line (3):  $\beta$ II-  
714 spectrin/PM ratio is low in lamellipodia (\* asterisk) compared to the adjacent cell body (\*\* asterisks), and  
715 lamellipodia blockage during the hypotonic shock is observed. H) The same cell presented in Figure 7 A is  
716 shown: endogenous  $\beta$ II-spectrin (green), clathrin heavy chain (CHC, magenta) and F-actin (blue) and imaged  
717 by TIRFM (scale bar: 10  $\mu$ m).

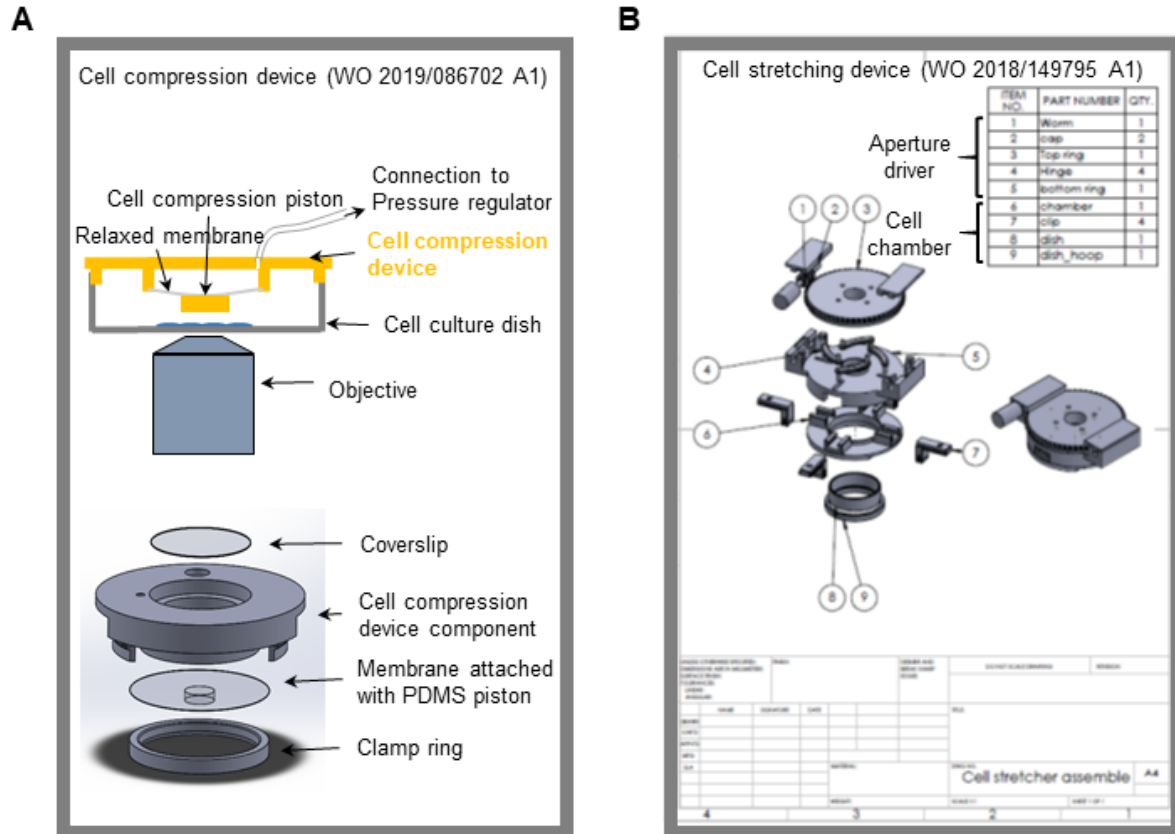

718  
719

**Figure S7 Cell compression and stretching devices**

720 A) Schematic explosion illustrating the single components of the pneumatic Cell Compression device. The  
721 same is reported for the Cell Stretching device implemented in this study (B).

722 **Extended Data Tables**

723 **Table 1 Spreading area/spectrin and area/actin linear regression analysis**

|                                 | Actin Integrated density | Spectrin integrated density |
|---------------------------------|--------------------------|-----------------------------|
| Pearson correlation coefficient | 0.5386254                | 0.7296664                   |
| Linear regression               |                          |                             |
| Best-fit values                 |                          |                             |
| B0                              | 4.758e+02                | 4.708e+02                   |
| B1                              | 4.459e-05                | 4.405e-05                   |
| Std. Error                      |                          |                             |
| B0                              | 4.260e+01                | 2.821e+01                   |
| B1                              | 3.962e-06                | 2.345e-06                   |
| T value                         |                          |                             |
| B0                              | 11.17                    | 16.69                       |
| B1                              | 11.26                    | 18.79                       |
| Goodness of Fit                 |                          |                             |
| Degrees of Freedom              | 371                      | 301                         |
| Multiple R-squared              | 0.2901                   | 0.5324                      |
| Adjusted R-squared              | 0.2878                   | 0.5309                      |
| p-value                         | 2.2e-16                  | 2.2e-16                     |
| Beta estimate                   | 4.45906e-05              | 4.40486e-05                 |
| Standard error                  | 3.96159e-06              | 2.344543e-06                |
| T value                         | 11.25574                 | 18.78771                    |
| P value                         | 7.35929e-25              | 4.67908e-53                 |
| F statistic                     | 7.16465e-25              | 7.16465e-25                 |
| F                               | 4.45906e-05              | 4.40486e-05                 |
| Model p                         | 3.96159e-06              | 2.34454e-06                 |
| Outliers                        | 12                       | 12                          |

724

725 **Table 2 Dual FRAP Analysis**

|                          | Diamide     |              | Nocodazole    |              | Latrunculin A |              | Blebbistatin |              |
|--------------------------|-------------|--------------|---------------|--------------|---------------|--------------|--------------|--------------|
|                          | Control     | Treated (5') | Control       | Treated (5') | Control       | Treated (5') | Control      | Treated (5') |
| One-phase association    |             |              |               |              |               |              |              |              |
| Best-fit values          |             |              |               |              |               |              |              |              |
| Y0                       | 0.009453    | 0.01164      | -0.05037      | 0.02238      | -0.01107      | -0.08307     | -0.004542    | -0.002546    |
| Plateau                  | 0.8569      | 0.3446       | 0.8513        | 0.8262       | 0.8294        | 0.8526       | 0.8371       | 0.6676       |
| K                        | 0.01803     | 0.01437      | 0.0196        | 0.01504      | 0.01989       | 0.02544      | 0.02008      | 0.01698      |
| Tau                      | 55.45       | 69.59        | 51.01         | 66.48        | 50.29         | 39.3         | 49.79        | 58.91        |
| Half-time (sec)          | 38.44       | 48.24        | 35.36         | 46.08        | 34.86         | 27.24        | 34.51        | 40.83        |
| Span                     | 0.8474      | 0.3329       | 0.9017        | 0.8038       | 0.8405        | 0.9357       | 0.8417       | 0.6701       |
| Std. Error               |             |              |               |              |               |              |              |              |
| Y0                       | 0.02527     | 0.03849      | 0.01835       | 0.02037      | 0.02294       | 0.03224      | 0.02625      | 0.02802      |
| Plateau                  | 0.006448    | 0.01448      | 0.004094      | 0.007067     | 0.005005      | 0.004843     | 0.00564      | 0.007901     |
| K                        | 0.000843    | 0.003078     | 0.0005928     | 0.0006812    | 0.0007993     | 0.001125     | 0.0009171    | 0.00116      |
| Span                     | 0.02315     | 0.0336       | 0.01704       | 0.01798      | 0.02135       | 0.03085      | 0.02447      | 0.02539      |
| 95% Confidence Intervals |             |              |               |              |               |              |              |              |
| Y0                       | -0.04013 to | -0.06389 to  | -0.08638 to - | -0.01760 to  | -0.05608 to   | -0.1463 to - | -0.05606 to  | -0.05753 to  |

|                         |                       |                        |                       |                       |                       |                       |                       |                       |
|-------------------------|-----------------------|------------------------|-----------------------|-----------------------|-----------------------|-----------------------|-----------------------|-----------------------|
|                         | 0.05903               | 0.08716                | 0.01436               | 0.06236               | 0.03393               | 0.01982               | 0.04698               | 0.05244               |
| Plateau                 | 0.8442 to<br>0.8695   | 0.3161 to<br>0.3730    | 0.8433 to<br>0.8594   | 0.8123 to<br>0.8401   | 0.8196 to<br>0.8392   | 0.8431 to<br>0.8621   | 0.8260 to<br>0.8482   | 0.6521 to<br>0.6831   |
| K                       | 0.01638 to<br>0.01969 | 0.008330 to<br>0.02041 | 0.01844 to<br>0.02077 | 0.01371 to<br>0.01638 | 0.01832 to<br>0.02145 | 0.02324 to<br>0.02765 | 0.01828 to<br>0.02188 | 0.01470 to<br>0.01925 |
| Tau                     | 50.80 to<br>61.05     | 49.00 to<br>120.0      | 48.15 to<br>54.22     | 61.05 to<br>72.96     | 46.61 to<br>54.59     | 36.17 to<br>43.04     | 45.70 to<br>54.69     | 51.95 to<br>68.03     |
| Half-time               | 35.21 to<br>42.32     | 33.96 to<br>83.21      | 33.38 to<br>37.59     | 42.32 to<br>50.57     | 32.31 to<br>37.84     | 25.07 to<br>29.83     | 31.67 to<br>37.91     | 36.01 to<br>47.15     |
| Span                    | 0.8020 to<br>0.8928   | 0.2670 to<br>0.3988    | 0.8683 to<br>0.9351   | 0.7685 to<br>0.8391   | 0.7986 to<br>0.8824   | 0.8751 to<br>0.9962   | 0.7936 to<br>0.8897   | 0.6203 to<br>0.7199   |
| Goodness of Fit         |                       |                        |                       |                       |                       |                       |                       |                       |
| Degrees of Freedom      | 1149                  | 1149                   | 1053                  | 1053                  | 1149                  | 1149                  | 957                   | 1149                  |
| R square                | 0.6867                | 0.1122                 | 0.8441                | 0.7471                | 0.7357                | 0.6725                | 0.7202                | 0.5177                |
| Absolute Sum of Squares | 15.39                 | 47.97                  | 6.027                 | 10.69                 | 10.97                 | 14.27                 | 9.822                 | 20.59                 |
| Sy.x                    | 0.1157                | 0.2043                 | 0.07566               | 0.1007                | 0.09771               | 0.1114                | 0.1013                | 0.1339                |

726

727

Table 3 FRAP analysis deletion mutants

|                          | WT                                        | $\Delta$ PE         | $\Delta$ ABD        | PE-only                                       | $\Delta$ PS<br>(not in figures) |
|--------------------------|-------------------------------------------|---------------------|---------------------|-----------------------------------------------|---------------------------------|
| One-phase association    |                                           |                     |                     |                                               |                                 |
| Best-fit values          |                                           |                     |                     |                                               |                                 |
| Y0                       | -0.05615                                  | -0.01408            | -0.1411             | -2.811                                        | -0.03120                        |
| Plateau                  | 0.7485                                    | 0.7320              | 0.8718              | 0.8699                                        | 0.7179                          |
| K                        | 0.01662                                   | 0.01220             | 0.02823             | 0.0004781                                     | 0.01296                         |
| Tau                      | 60.18                                     | 81.94               | 35.43               | 2091                                          | 77.13                           |
| Half-time (seconds)      | 41.71                                     | 56.80               | 24.56               | 1450(msec)                                    | 53.47                           |
| Span                     | 0.8046                                    | 0.7461              | 1.013               | 3.681                                         | 0.7491                          |
| Std. Error               |                                           |                     |                     |                                               |                                 |
| Y0                       | 0.01209                                   | 0.01963             | 0.02240             | 0.3488                                        | 0.02405                         |
| Plateau                  | 0.003295                                  | 0.009428            | 0.002599            | 0.002656                                      | 0.01029                         |
| K                        | 0.0003987                                 | 0.0006632           | 0.0007211           | 2.293e-005                                    | 0.0008132                       |
| Span                     | 0.01091                                   | 0.01635             | 0.02164             | 0.3483                                        | 0.02037                         |
| 95% Confidence Intervals |                                           |                     |                     |                                               |                                 |
| Y0                       | -0.07986 to -<br>0.03244                  | -0.05258 to 0.02442 | -0.1850 to -0.09716 | -3.495 to -2.126                              | -0.07838 to 0.01598             |
| Plateau                  | 0.7420 to 0.7549<br>0.01584 to<br>0.01740 | 0.7135 to 0.7505    | 0.8667 to 0.8769    | 0.8647 to 0.8751<br>0.0004332 to<br>0.0005231 | 0.6977 to 0.7380                |
| K                        | 0.01090 to 0.01350                        | 0.01090 to 0.01350  | 0.02681 to 0.02964  | 0.0005231                                     | 0.01137 to 0.01456              |
| Tau                      | 57.48 to 63.15                            | 74.05 to 91.72      | 33.74 to 37.30      | 1912 to 2309                                  | 68.68 to 87.96                  |
| Half-time                | 39.84 to 43.77                            | 51.33 to 63.57      | 23.38 to 25.85      | 1325 to 1600(msec)                            | 47.61 to 60.97                  |
| Span                     | 0.7832 to 0.8260                          | 0.7140 to 0.7781    | 0.9704 to 1.055     | 2.997 to 4.364                                | 0.7091 to 0.7890                |
| Goodness of Fit          |                                           |                     |                     |                                               |                                 |
| Degrees of Freedom       | 2205                                      | 1437                | 1341                | 1533                                          | 1149                            |
| R square                 | 0.8218                                    | 0.6519              | 0.8362              | 0.5420                                        | 0.6214                          |
| Absolute Sum of Squares  | 12.62                                     | 20.83               | 6.211               | 14.52                                         | 18.69                           |
| Sy.x                     | 0.07565                                   | 0.1204              | 0.06806             | 0.09732                                       | 0.1275                          |

728

729



## 730 **Methods**

731 No statistical methods were used to predetermine sample size.

### 732 **Cell culture and media**

733 Immortalized mouse embryonic fibroblasts (MEFs) derived from RPTP  $\alpha^{+/+}$  murine background (Su,  
734 Muranjan and Sap, 1999) were grown in complete media composed by DMEM (Lonza) supplemented with  
735 10% Fetal Bovine Serum South American (FBS SA, Euroclone) and 2mM Glutamine at 37°C and 5% CO<sub>2</sub>. Cells  
736 density never exceed 70% confluency to favor single-cell analysis instead of tissue-like behavior. For  
737 imaging experiments, MEFs were seeded on borosilicate glass coverslips of 1½ thickness (Corning) or Nunc  
738 Glass Base Dishes (Thermo Scientific) coated with sterile 10 µg/ml fibronectin (Sigma-Aldrich). During live  
739 imaging experiments, the culturing media was exchanged 30 minutes before experiments in serum-  
740 deprived Ca<sup>2+</sup>-buffered RINGER solution (see Resource Table for buffer composition) to avoid Ca<sup>2+</sup>/Mg<sup>2+</sup>  
741 withdrawal shocks and avoid phenol-red background contamination during laser excitation. For  
742 experiments with AP2σ plasmid, RINGER solution was supplemented with 10% FCS. Other cell lines were  
743 obtained from IFOM Cell Bank and cultured as follow: NIH3T3, HS27, RPMI, A-431 were cultured in DMEM  
744 (Lonza) supplemented with 10% Fetal Bovine Serum South American (FBS SA, Invitrogen). For MCF-10A,  
745 DMEM-Ham's F12 (Biowest VWR) was supplemented with 5% Horse Serum (Life Technologies), 10ug/ml  
746 Insuline, 20ng/ml EGF, 500ng/ml Hydrocortisone, 100ng/ml cholera toxin, 2mM L-Glutamine; MDA-MB 231  
747 were cultured in Leibovitz's L15 (Biowest VWR) supplemented with 10% FBS and 2mM L-Glutamine; HeLa  
748 were cultured in DMEM, 10% FBS, 1mM Na Pyruvate, 0.1mM NEAA, 2mM L-Glutamine. HUVEC primary  
749 cells were cultured in all-in-one ready-to-use Endothelial Cell Growth Medium (Cell application Inc. Merck).  
750 All reagents specific supplier and identifier are listed in the Resource Table.

### 751 **Plasmids and transient transfections**

752 Plasmids for the mammalian transient expression used in this study are listed in the Resource Table  
753 (supplemental information), describing the original source and identifier. Specifically, human  $\beta$ II-Spectrin  
754 (gene ID: NM\_003128) wild type construct was cloned into the pEGFP-C3 backbone (Clontech) between  
755 HindIII and SacII restriction sites, with the fluorescent tag at the N-terminus interspaced by an additional  
756 flexible linker composed of 11 residues (KYSDELKLA). For the generation of GFP- $\beta$ II-Spectrin- $\Delta$ PE,  
757 residues 1776-1907 were deleted from full-length  $\beta$ II-Spectrin. The same peptide was cloned in frame with  
758 GFP into the pEGFP-N1 backbone to generate GFP-PE domain only. For the generation of GFP- $\beta$ II-Spectrin-  
759  $\Delta$ PS, residues 421-530 were deleted from full-length  $\beta$ II-Spectrin. For the generation of GFP- $\beta$ II-Spectrin-  
760  $\Delta$ ABD, residues 280-2364 were amplified from full-length GFP- $\beta$ II-Spectrin, and cloned into pEGFP-C3  
761 backbone between HindIII and SacII restriction sites. Other plasmids were purchased or obtained from  
762 external sources listed in the Resource Table. Transient expression was obtained by electroporation  
763 performed 24 hours before the experiment using the Neon electroporation system (Thermo Fisher  
764 Scientific). For each transfection, 1x10<sup>6</sup> cells were trypsinized, washed once with PBS and mixed with a total  
765 of 10 µg recombinant DNA in electroporation buffer R (Invitrogen). Cells were singularly electroshocked at  
766 1600mV for 20 msec by placing the electroporation tip into the column filled by E2 buffer (following  
767 manufacturer specifications). After the shock, cells were immediately seeded onto tissue-culture grade  
768 plastic dishes replenished with complete culturing media and let recover at least 12 hours.

### 769 **CONFOCAL and TIRF Microscopy**

770 Confocal microscopy was performed on a Leica TCS SP8 laser scanning confocal microscope mounted on a  
771 Leica DMI 8 inverted microscope, equipped with a motorized stage and controlled by the software Leica  
772 Application Suite X (LASX) ver. 3.5.2.18963. For image acquisition, we used a HC PL APO CS2 63X/1,40 oil  
773 immersion objective. DIC, Epi-Fluorescence and Total Internal Reflection Fluorescence microscopy (TIRFM)  
774 of fixed specimens, live time-lapse of spreading cells, drug treatments, osmotic shocks, cell stretching (EPI  
775 mode only) and cell compression were performed on a Leica AM TIRF MC system. Two different objectives  
776 have been used: HCX PL APO 63X/1.47NA oil immersion and HCX PL APO 100X/1.47NA oil immersion. The  
777 lasers used for fluorochromes excitation were 488nm, 561nm, 635nm. A specific dichroic and emission

778 filters for each wavelength have been used. The microscope was controlled by Leica Application Suite AF  
779 software (Ver. 2.6.1.7314) and images were acquired with an Andor iXon DU-8285\_VP camera. For live  
780 imaging experiments, environmental conditions were maintained thanks to an Okolab temperature and  
781 CO<sub>2</sub> control system if needed.

### 782 **Micropatterning by Quartz Mask**

783 Borosilicate glass coverslips (Corning) were washed with 70% Ethanol, air-dried, activated with plasma  
784 cleaner (Harrick Plasma) for few minutes and incubated with 0.1 mg/ml PLL-PEG for 1 hour at room  
785 temperature. A quartz mask (Delta mask B.V.) was washed with 70% Ethanol and activated under UV light  
786 using a UV lamp (UVO Cleaner, Jelight). PEGylated coverslips were put on the desired pattern in the mask,  
787 which then was illuminated under UV light for 7 minutes. Patterned coverslips were coated with 5-25 µg/ml  
788 fibronectin for 1 hour at room temperature, washed several times with PBS and 1-5x10<sup>4</sup> RPTP cells were  
789 seeded and cultured at 37 °C in the same media described before.

### 790 **Micropatterning by PDMS Stamping**

791 Polydimethylsiloxane (Sylgard 184 silicone elastomere kit, Dow Corning) was prepared by mixing its two  
792 components in 1:10 ratio and degassed. It was then poured on the mold, degassed again and cured over  
793 night at 65°C. PDMS was peeled of the molds and plasma cleaned to make the surface hydrophilic. The  
794 stamps were then coated with 10-30 µg/ml fibronectin for 30 minutes at room temperature. Excess of  
795 fibronectin was air-dried and the stamps were gently pressed onto the previously silanized borosilicate  
796 glass bottom dishes or coverslips for 1 minute and then carefully removed. Silanization was achieved by  
797 pouring a methanol solution containing 0.16% v/v silane (Sigma-Aldrich) for 1 hour, followed by three  
798 washes in pure methanol. To passivate the surface of the non-fibronectin coated glass, the surface was  
799 treated with a solution of 0.5% PEG-PLL (Ruixibio) for 1 hour in order to avoid cell attachment on the  
800 unstamped area. After the incubation, the dishes were rinsed several times with PBS and 1-5x10<sup>4</sup> RPTP cells  
801 were seeded and cultured at 37 °C in the same media described before.

802

### 803 **Immunofluorescences**

804 The antibodies used in this study were the following: mouse anti-βII-spectrin (dilution 1:200, BD-  
805 bioscience), rabbit anti-βII-spectrin (1:200, Abcam), mouse anti-αII-spectrin (1:200, Invitrogen), rabbit anti-  
806 β-actin (1:100, Cell Signaling) and mouse anti-Clathrin Heavy Chain (1:500, Thermo Fisher, clone X22).  
807 Before fixation, cells were seeded on 10 µg/ml fibronectin-coated coverslips/glass-bottom dishes. Cell lines  
808 were fixed in 4% paraformaldehyde in PBS for 10 minutes and then neutralized using 10 mM NH<sub>4</sub>Cl in PBS  
809 for 10 minutes. Alternatively, fixation was performed in ice-cold methanol for 2 minutes at -20°C when cells  
810 were immunostained by anti-β-actin antibody. Cells were subsequently washed three times with PBS (5  
811 minutes each), permeabilized for 2-5 minutes using PBS containing 0.1% Triton X-100 and blocked with 3-  
812 5% BSA for 10 minutes at room temperature. Then, cells were incubated with primary antibody for 1 hour  
813 at room temperature or over-night at 4°C. After 3 washing steps in PBS, cells were incubated with Alexa  
814 488/647-conjugated goat anti-mouse or anti-rabbit (1:100-1:400, Thermo Fischer) and Alexa 488/546-  
815 conjugated phalloidin (1:200, Sigma-Aldrich) for 1 hour at room temperature. After three washes in PBS of  
816 5 minutes each, cells were mounted with glycerol (for confocal microscopy) or in PBS (for TIRF microscopy)  
817 and stored at 4°C. All primary antibodies and fluorophore-conjugated secondary antibodies, source and  
818 identifier are listed in Resource Table. For intensity correlation analysis (Pearson's coefficient and scatter  
819 plot), the plug-in JACoP was used (Bolte and Cordelieres, 2006) and plotted using R ggplot2 package.

820

### 821 **Western Blotting**

822 For western blot, cells seeded on plastic tissue culture grade dishes were lysate directly on the plate by  
823 adding modified Sample buffer composed by Tris-HCl 135mM (pH 6.8), Sodium dodecyl sulphate (SDS) 5%,  
824 Urea 3.5M, NP-40 2.3%,  $\beta$ -mercaptoethanol 4.5%, glycerol 4% and traces of bromophenol blue. Cells were  
825 normalized by seeding density since this lysis buffer does not allow total protein content measurements,  
826 but prevent membrane-bound proteins from being degraded during trypsinization. An equal volume of  
827 samples was then loaded on 12-8% SDS-PAGE gels and transferred to nitrocellulose membrane (Amersham  
828 GE-Healthcare). Membranes were blocked in 5% milk-TBS with 0.1-0.3% Tween-20 for 1 hour at room  
829 temperature, then incubated overnight at 4° with primary antibodies (mouse anti- $\beta$ II-spectrin 1:2000  
830 dilution (BD-bioscience), rabbit anti- $\beta$ II-spectrin 1:2000 dilution (Abcam), mouse anti- $\beta$ -tubulin dilution  
831 1:5000 (Sigma-Aldrich) and 1 hour at room temperature with HRP-conjugated secondary antibodies  
832 (BioRad). Proteins were detected with ECL Western blotting reagents (Amersham GE-Healthcare), by the  
833 digital Chemidoc XRS+ run by the software Image Lab (Biorad).

834

### 835 **Fixed Spreading assay**

836 MEFs were seeded on 10  $\mu$ g/ml fibronectin-coated coverslips/glass-bottom dishes in complete media, as  
837 previously described. A total of  $10^5$  cells were seeded and fixed at different time points (between 5 and 20  
838 minutes after seeding) by 4% paraformaldehyde diluted in PBS for 10 minutes. Before detergent  
839 permeabilization for immunostaining, fixed cells were incubated with membrane dye FM4-64 FX (Thermo  
840 Scientific) according to manufacturer specification (2.5-5  $\mu$ g/ml). A second fixation step was applied to  
841 preserve cell membrane staining by the fixable dye and avoid diffusion after a subsequent permeabilization  
842 step in 0.1% Triton-X100 (1-2 minutes). Immunostaining for  $\beta$ II-spectrin and F-actin (phalloidin) was  
843 performed as previously described for TIRFM investigation. From the raw images, the signal background  
844 was subtracted, while edge-preserving filters were applied to the FM4-64 fluorescence signal to generate a  
845 binary mask of the projected cell area in the TIRF plane. The Fiji built-in “Analyze particle” tool was then  
846 used to extract the projected area value as well as the integrated density of the two immunostainings ( $\beta$ II-  
847 spectrin and F-Actin). Linear regression analysis between the three parameters was then performed by R  
848 software, and raw data points plotted by the software Graphpad Prism.

849

### 850 **Live Spreading assay**

851 The spreading assay was performed on custom-designed 2-way aluminium slides, sealed on the two planar  
852 faces by 22x22 mm glass coverslips welded by high vacuum grease (Sigma-Aldrich). Coverslips were  
853 previously acid-washed with a 20% HNO<sub>3</sub> solution for 2 hours at room temperature, followed by a final  
854 wash in pure acetone before being dried and coated with 10  $\mu$ g/ml fibronectin for 1 hour at 37°C. The  
855 chamber was rinsed with 1x RINGER solution and incubated on the microscope stage at 37°. The dual glass  
856 surfaces allow simultaneous fluorescence and DIC illumination during media addition/exchange. MEFs were  
857 transfected 24 hours before imaging with the opportune plasmid combinations. Before the experiment,  
858 cells were trypsinized, centrifuged 5 minutes at 1200 rpm, washed once with PBS and serum-starved in  
859 suspension for 30 minutes at 37° in CO<sub>2</sub>-independent 1X RINGER solution. Suspended cells were thereafter  
860 kept at room temperature up to 3 hours. For each time-lapse,  $1-5 \times 10^4$  cells were fluxed into the imaging  
861 chamber to optimally observe single-cell spreading; for this reason cell aggregates or debris were carefully  
862 avoided during imaging. The time-lapse started after a positively double-transfected cell engaged with the  
863 fibronectin-coated surface; cells were then followed for 15-20 minutes at time rates of 2-5 seconds/frame.  
864 For experiments in presence of myosin II inhibitor blebbistatin (Sigma-Aldrich), cells were suspended in 1x  
865 RINGER solution supplemented with blebbistatin at 50 $\mu$ M final concentration; imaging chambers were  
866 filled with the same 1x RINGER solution supplemented with blebbistatin to avoid rebound effects upon  
867 injection of cell suspension. The correct cell behaviour was monitored by DIC acquisition, in particular by  
868 focusing on cell integrity, isotropic spreading in P1, lamellipodia formation and buckling. The fluorescent  
869 channels were analysed as described in the next sections for cell edge and body behaviour.

870

### 871 **Spectrin and actin intensities at the cell edge**

872 For cell edge analysis a custom macro for Fiji was written. The signal background was subtracted, while  
873 edge-preserving filters were applied to the actin fluorescence signal to generate a binary mask of the  
874 growing cell area over time. The centroid of the cell was used as a reference point to identify each angle  
875 between  $0^\circ$  and  $359^\circ$  on the cell outer circumference. From the edge, the signal was eroded by 25 pixels  
876 ( $\approx 3.2\mu\text{m}$  at the resolution of  $\approx 130\text{nm}/\text{pixel}$ ) and mean intensity of the fluorescent signals were computed  
877 into the final kymographs composed of 360 pixels on the x-axis, one for each angle, while the y-axis  
878 represents the total number of frames. Speed of the cell edge was extrapolated from the distance variation  
879 in pixel between the outer edge and the cell centroid, at known pixel size and time frame. Values were  
880 considered positive when the edge moved away from the centroid and negative when it moved closer. For  
881 comparisons between independent cells, actin and spectrin intensity measurements were normalized to 1  
882 at null speed. Results were analyzed and plotted with R and the ggplot2 R package.

883

#### 884 **Correlated Spectrin and actin flow velocity analysis (PIV)**

885 Correlation between speed and directionality of the two fluorescent channels have been performed on the  
886 same live TIRFM datasets during the spreading analyzed for cell edge dynamics. The signal background was  
887 subtracted. Particle Image Velocimetry (PIV) was performed independently on single fluorescent channels  
888 by a custom macro in Fiji, excluding the portion of the cell close to the edge (50 pixels) and the frames  
889 corresponding to the initial spreading phase P1 from the analysis (50 frames). The resulting vector fields of  
890 the two channels (i.e. RFP-actin and GFP- $\beta$ II-spectrin) mapped both the speed magnitude and directionality  
891 (angle) of the channels independently. To identify synchronous angular and speed correlations between the  
892 two channels, their correlation was binarized by giving a value of 1 to areas where the speeds of the two  
893 channels were within  $\pm 50\%$  of each other, and where the directions shared the same quadrant (i.e. when  
894 the difference of angle was less than  $\pi/2$ ). Areas that did not meet these criteria were assigned a value of 0.  
895 The fraction of correlated flow velocities was then given as the ratio between the area covered by  
896 correlated velocities and the area of the cell after excluding the edge portion. The area of correlated  
897 motion was calculated for each binarized frame by the “Analyze particle” tool, and by randomly applying  
898 the Watershed algorithm to segment neighbour areas with no morphological continuity. The same  
899 parameters were blindly applied to the untreated and blebbistatin-treated time-lapses to avoid bias.  
900 Results were analyzed and plotted with R and the ggplot2 R package.

901

#### 902 **Cytoskeletal Drug Perturbation and osmotic shocks**

903 MEFs were transfected 24 hours before imaging with the opportune pair of constructs as previously  
904 described. Before imaging, cells were trypsinized, seeded on glass coverslip coated with  $10\mu\text{g}/\text{ml}$   
905 fibronectin ( $1 \times 10^3$  cells) and allowed to attach to the substrate for 1 hour in complete media. The media  
906 was replaced with  $\text{CO}_2$ -independent 1x RINGER solution and mounted on a 2-way imaging chamber that  
907 allows on-stage media exchange as previously described for the spreading assay. Time-lapse consisted of an  
908 initial phase of 5 minutes where sufficient frames were acquired at steady-state (internal control); the  
909 media was then replaced by 1x RINGER solution supplemented with the opportune cytoskeletal impairing  
910 drugs. Addition of media exceeded the volume of the imaging chamber to avoid dilution of final drug  
911 concentrations and rebound effect. Specifically,  $1\mu\text{M}$  Latrunculin A,  $10\mu\text{M}$  Blebbistatin,  $5\mu\text{M}$  Nocodazole  
912 and  $5\text{mM}$  Diamide were singularly used (Sigma-Aldrich). Perturbed cells were then imaged for 30 minutes  
913 at 1-5 minute/frame. Intensity calculations were carried out in Fiji by subtracting the background and  
914 creating a dynamic binary mask of the GFP- $\beta$ II-Spectrin signal; the built-in “Analyze particle” tool was  
915 applied to obtain mean fluorescence intensity values at different time points. Only untreated, 5 and 30  
916 minutes after treatment time points were plotted using the software Graphpad Prism.

917 For experiments that required osmotic shocks, MEFs cells were treated following the same procedure  
918 described earlier for cytoskeletal perturbations. Time-lapse was obtained at higher temporal resolution (2-5  
919 second/frame). At given time points (every 3-5 minutes depending on the experiment), the media was  
920 replaced with hypotonic 0.5x or 0.1x RINGER solution, exceeding the volume of the imaging chamber to  
921 avoid incomplete media exchange. Mean intensity calculation was done in Fiji by subtracting the  
922 background and creating a dynamic binary mask to derive changes in fluorescence intensity over time. In

923 the case of ratio measurements between the two fluorescent channels, mean intensities of the first two  
924 frames of the meaningful channels were averaged and arithmetically matched to obtain the initial ratio  
925 value of 1 (non-stoichiometric). Indeed, the purpose of these experiments was to calculate the fluctuation  
926 in content more than a stoichiometric measurement between the two fluorescent proteins. Intensity data  
927 were then averaged, analyzed and plotted using the software Graphpad Prism.

## 928 **Cell stretching**

929 Cell stretching experiments were performed using an automated cell stretching dish (International patent:  
930 WO 2018/149795 A1). The components of the cell stretching dish were designed using SolidWorks software  
931 and 3D printed using a stereolithography-based 3D printer (Form 2, Formlabs) coupled with an  
932 autoclavable and biocompatible dental resin (Dental SG resin, Formlabs). The printed parts were rinsed in  
933 isopropyl alcohol for 5 minutes to remove any uncured resin from their surface, and then post-cured in a  
934 UV box to finalize the polymerization process and stabilize mechanical properties. The printed parts were  
935 then polished and assembled to create the lower (cell chamber) and the upper portion (aperture driver)  
936 characterizing the stretching dish. Before the experiments, the components of the lower portion were  
937 autoclaved to be sterilized and assembled to clamp a deformable silicone membrane (thickness 0.005",  
938 SMI), thus creating a cell culture chamber. The dish was coated with fibronectin (10 µg/ml) and incubated  
939 at 37 °C for 1 hour. A total of  $10^5$  cells were seeded in the cell chamber and let spread for 1-2 hours at 37  
940 °C. Before starting the imaging, the whole-cell stretching dish was assembled by connecting the upper  
941 portion, consisting in the driving unit, to the cell culture chamber. Biaxial stretching was applied to all the  
942 samples under investigation. The EPI-fluorescence mode of the Leica AM TIRF MC system was used. Due to  
943 technical limitations such as re-focusing and re-centering of the cell under investigation, after each 5% step  
944 increase in the biaxial stretch obtained by the software-controlled motorized device, a single frame in the  
945 two fluorescent channels was recorded.

## 946 **Cell compression**

947 Cell compression experiments were performed using a cell compression device (International patent: WO  
948 2019/086702 A1) capable of applying dynamic compression stress to single cells. The main components of  
949 the compression device were designed using SolidWorks software and 3D printed using a  
950 stereolithography-based 3D printer (Form 2, Formlabs), following the same procedure described in for the  
951 cell stretching device. The cell compression device consists of an air chamber connected to an air pressure  
952 regulator. Before the experiments, a Polydimethylsiloxane (PDMS, Sylgard 184) piston was microfabricated  
953 to have circular pillars (200 µm in diameter) on its surface, and attached to a deformable silicone  
954 membrane (thickness 0.005", SMI) through plasma bonding. The membrane with the piston was then  
955 clamped to the air chamber. The assembled cell compression device was connected to the air pressure  
956 regulator and then locked to the cell culture dish (seeded with cells) through mechanical ribs. In particular,  
957 a total of  $10^5$  cells were seeded on 27mm Ø Nunc Glass Base Dishes (Thermo Scientific), exchanged to 1x  
958 RINGER solution 30 minutes before imaging and the original Petri lid replaced by the compression device. A  
959 dynamic compressive load was applied to cells by increasing the air pressure inside the compression device  
960 through the pressure regulator, thus controlling the movement of the membrane and the piston to  
961 compress the cells underneath. DIC and TIRF illumination were used to monitor cell reaction at 5  
962 seconds/frame rate. ROIs to measure fluorescence intensity fluctuation was drawn in Fiji, while the DIC was  
963 used to monitor the engagement of the piston with the cell roof. As the compression strain increased, the  
964 cell became flatter and DIC imaging decreased its contrast in physiologically flat fibroblasts. Due to cell  
965 height variation, the device does not allow precise absolute read-out of the pressure applied to cells, being  
966 cell deformation a non-controllable variable. For this reason, two different approaches were applied. The  
967 first one was intended to cause maximal cell response: compression pressure was slowly increased until  
968 bleb formation was observed. For i-bleb/cortex ratio, mean fluorescence intensities in the two channels  
969 were obtained in the projected bleb area, and divide by the mean fluorescence intensities in the adjacent  
970 cortical region of similar area. The second approach was designed to better control the applied strain: the  
971 initial compression was thus set at the first value required to engage the piston with the top of the cell as  
972 monitored by DIC. This first step hardly caused a reaction monitorable by TIRF at basal cell level but allowed

973 consistency between independent experiments, for this reason six different cycles of compression (2  
974 minutes) and relaxation (2 minutes) were performed at increasing pressure, as schematized in D; the 2  
975 minutes compression step duration was chosen to allow adaptive mechanisms to occur and avoid long-  
976 term detrimental effects on cell integrity. Intensity calculations were carried out in Fiji by subtracting the  
977 background and drawing ROIs across the perinuclear rim formed during compression. Pre-stretch mean  
978 intensity for each single compressive events was divided by maximal mean intensity registered during the  
979 subsequent 2 minutes compressive step. Data were plotted using the software Graphpad Prism.

## 980 **Frap experiments**

981 MEFs cells expressing GFP- $\beta$ II-spectrin constructs were imaged 24 hours after transfection with a Confocal  
982 Spinning disk microscope (Olympus) equipped with iXon 897 Ultra camera (ANDOR) and a FRAP module  
983 furnished with a 405nm laser. The environmental control was maintained with an OKOLab incubator.  
984 Images were acquired using a 100x/1.35Sil silicone oil immersion objective. MEFs were trypsinized and  
985 seeded on glass-bottom dishes (Matek, Sigma-Aldrich) coated with 10  $\mu$ g/ml fibronectin. Before imaging,  
986 CO<sub>2</sub>-independent media without phenol-red was exchanged. Squared Regions Of Interest of 5x5 $\mu$ m length  
987 were photo-bleached with the 405 nm laser at 50% intensity and post-bleach images were followed with 15  
988 to 20% laser intensity for 100 frames (1 frame every 5 seconds for full-length and truncated GFP- $\beta$ II-  
989 spectrin constructs and 0.5 seconds for PE-only). FRAP data were analyzed and curves fitted to the one-  
990 exponential recovery equations (one-phase association) by the software Graphpad Prism:

991

992

$$I = I_0 + I_{max} * [1 - e^{-(k) * (t)}]$$

993

994 Where I represents the relative intensity compared to the pre-bleach value, k the association rate, and t the  
995 half time recovery expressed in seconds.

996 For the dual FRAP assay, cells were seeded on a fibronectin-coated glass coverslip and mounted on the 2-  
997 way imaging chamber that allows on-stage media exchange as previously described for spreading assay and  
998 osmotic shocks. The first FRAP measurements were conducted in serum-free 1x Ringer solution; at  
999 completion, the media was exchanged and independently supplemented with the cytoskeletal drugs at the  
1000 concentration used before. Specifically, 1  $\mu$ M Latrunculin A, 10  $\mu$ M Blebbistatin, 5  $\mu$ M Nocodazole and 5  
1001 mM Diamide (Sigma-Aldrich). Cells were allowed to equilibrate with the new media for 5 minutes;  
1002 afterwards, a second FRAP analysis was started on the same cell previously analyzed.

1003

1004

## **Clathrin pits density maps**

1005 TIRFM images were acquired as previously described. For analysis of fixed specimens, 2x2  $\mu$ m ROIs were  
1006 selected by segmenting only discrete pits of random sizes, not overlapping with neighbouring structures  
1007 (plaques were not considered for the analysis). All images were stacked in FIJI for pit size calculation.  
1008 CHC/AP2 Images were up-scaled by a factor of 10, Yen auto-threshold applied to create a binary mask and  
1009 particle size calculated by the "Analyze particle" tool in FIJI. ROIs were divided at this point according to the  
1010 size that took into account the diffraction limits of TIRFM (<300nm<sup>2</sup> and 300-500nm<sup>2</sup>); particle bigger that  
1011 500nm<sup>2</sup> were not considered informative. Raw images of the two clusters were then independently stacked  
1012 and z-projected for median intensity values. Gaussian blur filter (1 pixel radius) and a scale factor of 10  
1013 were applied to the projected images to homogenize the signals. Scaled-projected images of the two  
1014 particle-size groups were then matched for signal intensities between corresponding channels. Normalized  
1015 radial plots were generated by the Radial Profile plugin (FIJI) on the final 2x2  $\mu$ m projected images.

1016 For live imaging datasets, Unsharp Mask (1 pixel radius, 0.6 weight) and Gaussian blur filter (1 pixel radius)  
1017 were applied to the raw images before ROIs selection. No additional filters were applied to the final  
1018 projected images. Similar filtering strategy was applied in live datasets during osmotic shocks.

1019

1020

## **RNA EXTRACTION AND qPCR ANALYSIS**

1021 Cells were cultured as previously described. At least  $2 \times 10^5$  cells were lysed and RNA was extracted with the  
1022 RNAeasy Mini Kit (Qiagen) following manufacturer specifications. 1  $\mu\text{g}$  of RNA was retrotranscribed using  
1023 “qScript cDNA Synthesis kit” (Quantabio). For gene expression analysis, 5ng of cDNA was amplified (in  
1024 triplicate) in a reaction volume of 10  $\mu\text{L}$  containing the following reagents: 5  $\mu\text{l}$  of TaqMan® Fast Advanced  
1025 Master Mix, 0.5  $\mu\text{l}$  of TaqMan Gene expression assay 20x (Thermo Fisher). The entire process  
1026 (retrotranscription, gene expression and data analysis) was performed by the qPCR-Service at Cogentech-  
1027 Milano, following the ABI assay ID Database (Thermo Fischer). Therefore, only gene ID of the spectrin  
1028 murine genes analyzed could be provided here (Mm01315345\_m1, Mm01180701\_m1, Mm01326617\_m1,  
1029 Mm00661691\_m1, Mm01284057\_m1, Mm01239117\_m1). Murine SPTBN5 primers were custom designed  
1030 (Fw: GGACGCCAGTGTTCAACAA Rev: GCCCCTTGTAGCAGCTT) since were not implemented in the database.  
1031 Real-time PCR was carried out on the 7500 Real-Time PCR System (Thermo Fisher), using a pre-PCR step of  
1032 20 seconds at 95°C, followed by 40 cycles of 1 second at 95°C and 20 seconds at 60°C. Samples were  
1033 amplified with primers and probes for each target and for all the targets one NTC sample was run.  
1034 Raw data (Ct) were analyzed with “Biogazelle qbase plus” software and the fold change was expressed as  
1035 CNRQ (Calibrated Normalized Relative Quantity) with Standard Error (SE). Gapdh was used as references to  
1036 normalize the data. Three independent experiments were then averaged and plotted using the software  
1037 Graphdap Prism.

1038  
1039

### **Statistical analysis**

1040 All the graphs and plots are presented as mean  $\pm$  SD, except the FRAP recovery curves that are presented as  
1041 mean  $\pm$  SEM. These experiments were further analysed by fitting mean values to an exponential equation,  
1042 therefore the authors considered trivial to show the accuracy of the mean (better described by the  
1043 definition of SEM) instead of the intrinsic variability between independent experiments. Half-time recovery  
1044 data was then plotted as mean  $\pm$  95% confidence interval of the fitting. Statistical analysis by unpaired T-  
1045 test was performed when the comparison between two experimental groups was required (i.e. normalized  
1046 i-bleb/cortex ratio). One-way Anova analysis was performed when multiple experimental groups were  
1047 present. One-way Anova analysis with multiple comparisons between groups was also performed in  
1048 parallel, as shown for the quantification of maximal intensity at the cell body during the sequential  
1049 compression protocol. All the experiments were performed in triplicate or more, as indicated in the figure  
1050 legends.

1051  
1052

### **CONTACT FOR RESOURCE SHARING**

1053 Further information and requests for resources and reagents will be provided upon reasonable request.  
1054 Inquiries should be addressed and fulfilled by the Lead Contact, Nils Gauthier.  
1055

1056 **Resource Table**

| REAGENTS or RESOURCES                           |                                                                                                                |                                                  |
|-------------------------------------------------|----------------------------------------------------------------------------------------------------------------|--------------------------------------------------|
| Antibodies                                      | Source                                                                                                         | Identifier                                       |
| Mouse anti-SPTBN1                               | BD Bioscience                                                                                                  | BD-612563                                        |
| Rabbit anti-SPTBN1                              | Abcam                                                                                                          | AB-72239                                         |
| Rabbit anti-SPATN1                              | Invitrogen                                                                                                     | PA5-35383                                        |
| Rabbit-anti $\beta$ -Actin                      | Cell Sign                                                                                                      | D6A8                                             |
| Mouse-anti Tubulin                              | Sigma                                                                                                          | T9026                                            |
| Mouse Clathrin-heavy chain                      | Thermo Fisher                                                                                                  | clone X22                                        |
| Phalloidin AlexaFluor488                        | Invitrogen                                                                                                     | A12379                                           |
| Phalloidin AlexaFluor568                        | Invitrogen                                                                                                     | A12380                                           |
| Rabbit-anti mouse HRP                           | BioRad                                                                                                         | 1706516                                          |
| Mouse-anti rabbit HRP                           | BioRad                                                                                                         | 1706515                                          |
| Donkey anti-mouse AlexaFluor488                 | Thermo Fischer                                                                                                 | A21202                                           |
| Donkey anti-rabbit AlexaFluor488                | Thermo Fischer                                                                                                 | A21206                                           |
| Donkey anti-mouse AlexaFluor647                 | Thermo Fischer                                                                                                 | A31571                                           |
| Donkey anti-rabbit AlexaFluor647                | Thermo Fischer                                                                                                 | A31573                                           |
| Donkey anti-mouse Cy3                           | Jackson Imm Res                                                                                                | 715-165-150                                      |
| Donkey anti-rebbit Cy3                          | Jackson Imm Res                                                                                                | 711-165-152                                      |
| RINGER buffer for Live Microscopy               | COMPOSITION                                                                                                    |                                                  |
| 1x                                              | 150 mM NaCl, 1mM MgCl <sub>2</sub> , 1mM CaCl <sub>2</sub> , 20 mM Hepes (pH 7.4), 5 mM KCl and 2g/l glucose   |                                                  |
| 0.5x                                            | 75 mM NaCl, 1mM MgCl <sub>2</sub> , 1mM CaCl <sub>2</sub> , 10 mM Hepes (pH 7.4), 2.5 mM KCl and 1g/l glucose  |                                                  |
| 0.1x                                            | 15 mM NaCl, 1mM MgCl <sub>2</sub> , 1mM CaCl <sub>2</sub> , 2 mM Hepes (pH 7.4), 0.5 mM KCl and 0.2g/l glucose |                                                  |
| 1.5x                                            | 225 mM NaCl, 1mM MgCl <sub>2</sub> , 1mM CaCl <sub>2</sub> , 30 mM Hepes (pH 7.4), 7.5 mM KCl and 3g/l glucose |                                                  |
| Plasmids                                        | Source                                                                                                         | Identifier                                       |
| GFP-SPTBN1                                      | This manuscript                                                                                                |                                                  |
| GFP-Actin                                       | MBI                                                                                                            |                                                  |
| RFP-Actin                                       | MBI                                                                                                            |                                                  |
| mCherry-SPTBN1                                  | This manuscript                                                                                                |                                                  |
| GFP-SPTBN1-mCherry                              | This manuscript                                                                                                |                                                  |
| GFP-PM (Lyn)                                    | Addgene                                                                                                        | 21213                                            |
| Scarlet-PM (Lck)                                | Addgene                                                                                                        | 98821                                            |
| GFP-SPTBN1 $\Delta$ PE                          | This manuscript                                                                                                |                                                  |
| GFP-SPTBN1 $\Delta$ PS                          | This manuscript                                                                                                |                                                  |
| GFP-SPTBN1 $\Delta$ ABD                         | This manuscript                                                                                                |                                                  |
| GFP-SPTBN1 PE only                              | This manuscript                                                                                                |                                                  |
| mCherry-AP2 $\sigma$                            | DiFiore' Lab                                                                                                   |                                                  |
| LifeAct-Ruby                                    | MBI                                                                                                            |                                                  |
| RFP-Myosin Light Chain                          | MBI                                                                                                            |                                                  |
| Cell lines                                      | Source                                                                                                         |                                                  |
| Immortalized MEF (RPTP $\alpha$ +/- background) | Sheetz' Lab                                                                                                    | <a href="#">JCellBiol.</a> 2003 14;161(1):143-53 |
| NIH-3T3                                         | IFOM cell bank                                                                                                 |                                                  |
| HS27                                            | IFOM cell bank                                                                                                 |                                                  |
| RPMI                                            | IFOM cell bank                                                                                                 |                                                  |
| A431                                            | IFOM cell bank                                                                                                 |                                                  |
| MCF-10A                                         | IFOM cell bank                                                                                                 |                                                  |



|           |                |
|-----------|----------------|
| MDA-MB231 | IFOM cell bank |
| Hela      | IFOM cell bank |
| HUVEC     | IFOM cell bank |

| Reagents                                 | Source            | Identifier  |
|------------------------------------------|-------------------|-------------|
| Nitric acid                              | Sigma             | 438073      |
| Latrunculin A                            | Sigma             | L5163       |
| Blebbistatin                             | Sigma             | B0560       |
| Nocodazole                               | Sigma             | M1404       |
| Diamide                                  | Sigma             | D3648       |
| Hexamethyldisilazane                     | Sigma             | 440191      |
| Sylgard 184 silicone elastomere kit      | Dow Corning       | 1064291     |
| PEG-PLL                                  | Ruixibio          | R-PL1226    |
| Silicone membrane                        | SMI               |             |
| Dow Corning® high-vacuum silicone grease | Sigma             | Z273554-1EA |
| FM4-64 FX                                | Thermo Scientific | F34653      |

| Cell culture Reagents          | Source                 | Identifier       |
|--------------------------------|------------------------|------------------|
| DMEM High Glucose              | Lonza                  | BE12-614F        |
| HAM'S F12                      | Biowest (VWR)          | L0136-500        |
| Leibovitz L15                  | Biowest (VWR)          | L0300-500        |
| Endothelial Cell Growth Medium | Cell Applications, inc | 211-500          |
| Fetal Bovine Serum             | Euroclone              | ECS0182L         |
| Horse Serum                    | Life Technologies      | 16050-122        |
| Cholera Toxin                  | Sigma-Aldrich          | C8052-2MG        |
| Holo Transferrin               | Sigma-Aldrich          | T0665-100MG      |
| Hydrocortisone                 | Sigma-Aldrich          | H0888-1G         |
| Insulin (Bovine pancreas)      | Sigma-Aldrich          | I0516-5ML        |
| L-Glutamine                    | Euroclone              | LOBE17605F       |
| Sodium Pyruvate                | Microtech              | L0642            |
| Trypsin-EDTA                   | Euroclone              | ECB3052D-20      |
| Penicillin Streptomycin        | Euroclone              | ECB3001L         |
| Puromycin                      | Vinci-Adipogen         | AG-CN2-0078-M100 |
| Fibronectin                    | Roche                  | 11080938001      |

| Microscopes                 | Brand   |
|-----------------------------|---------|
| TIRF                        | Leica   |
| SP5 laser scanning confocal | Leica   |
| SP8 laser scanning confocal | Leica   |
| Spinning Disk Confocal Unit | Olympus |

| Devices                   | Source        | Patent n°         |
|---------------------------|---------------|-------------------|
| Cell compression          | IFOM          | WO 2019/086702 A1 |
| Cell stretcher            | IFOM          | WO 2018/149795 A1 |
| Aluminum coverslip holder | Nils Gauthier |                   |
| Micropatterning wafer     | MBI/IFOM      |                   |

| Software        | Brand    |
|-----------------|----------|
| LAS X           | Leica    |
| CellSense       | Olympus  |
| Prism           | Graphpad |
| Image Lab (5.0) | Biorad   |

Fiji  
R studio  
Illustrator

NIH  
Adobe

---

1057

1058

## 1059 References

- 1108 Avery, A. W., Fealey, M. E., Wang, F., Orlova, A., Thompson, A. R., Thomas, D. D., Hays, T. S. and Egelman, E.  
1109 H. (2017) 'Structural basis for high-affinity actin binding revealed by a  $\beta$ -III-spectrin SCA5 missense  
1110 mutation', *Nature Communications*, 8(1), pp. 1350.
- 1111 Baines, A. J. (2009) 'Evolution of spectrin function in cytoskeletal and membrane networks', *Biochem Soc*  
1112 *Trans*, 37(Pt 4), pp. 796-803.
- 1113 Bañuelos, S., Saraste, M. and Carugo, K. D. (1998) 'Structural comparisons of calponin homology domains:  
1114 implications for actin binding', *Structure*, 6(11), pp. 1419-1431.
- 1115 Bennett, V. and Healy, J. (2009) 'Membrane Domains Based on Ankyrin and Spectrin Associated with Cell-  
1116 Cell Interactions'.
- 1117 Bennett, V. and Lorenzo, D. N. (2016) 'An Adaptable Spectrin/Ankyrin-Based Mechanism for Long-Range  
1118 Organization of Plasma Membranes in Vertebrate Tissues', *Curr Top Membr*, 77, pp. 143-84.
- 1119 Boulant, S., Kural, C., Zeeh, J. C., Ubelmann, F. and Kirchhausen, T. (2011) 'Actin dynamics counteract  
1120 membrane tension during clathrin-mediated endocytosis', *Nat Cell Biol*, 13(9), pp. 1124-31.
- 1121 Byers, T. J. and Branton, D. (1985) 'Visualization of the protein associations in the erythrocyte membrane  
1122 skeleton', *Proc Natl Acad Sci U S A*, 82(18), pp. 6153-7.
- 1123 Charras, G. T., Hu, C. K., Coughlin, M. and Mitchison, T. J. (2006) 'Reassembly of contractile actin cortex in  
1124 cell blebs', *J Cell Biol*, 175(3), pp. 477-90.
- 1125 Chugh, P., Clark, A. G., Smith, M. B., Cassani, D. A. D., Dierkes, K., Ragab, A., Roux, P. P., Charras, G.,  
1126 Saibreux, G. and Paluch, E. K. (2017) 'Actin cortex architecture regulates cell surface tension', *Nat Cell Biol*,  
1127 19(6), pp. 689-697.
- 1128 Deuticke, B., Poser, B., Lutkemeier, P. and Haest, C. W. (1983) 'Formation of aqueous pores in the human  
1129 erythrocyte membrane after oxidative cross-linking of spectrin by diamide', *Biochim Biophys Acta*, 731(2),  
1130 pp. 196-210.
- 1131 Djinic-Carugo, K., Gautel, M., Ylanne, J. and Young, P. (2002) 'The spectrin repeat: a structural platform  
1132 for cytoskeletal protein assemblies', *Febs Letters*, 513(1), pp. 119-123.
- 1133 Doherty, G. J. and McMahon, H. T. (2009) 'Mechanisms of endocytosis', *Annu Rev Biochem*, 78, pp. 857-902.
- 1134 Duan, R., Kim, J. H., Shilagardi, K., Schifffhauer, E. S., Lee, D. M., Son, S., Li, S., Thomas, C., Luo, T., Fletcher,  
1135 D. A., Robinson, D. N. and Chen, E. H. (2018) 'Spectrin is a mechanoresponsive protein shaping fusogenic  
1136 synapse architecture during myoblast fusion', *Nature Cell Biology*, 20(6), pp. 688.
- 1137 Dubin-Thaler, B. J., Hofman, J. M., Cai, Y., Xenias, H., Spielman, I., Shneidman, A. V., David, L. A., Dobereiner,  
1138 H. G., Wiggins, C. H. and Sheetz, M. P. (2008) 'Quantification of cell edge velocities and traction forces  
1139 reveals distinct motility modules during cell spreading', *PLoS ONE*, 3(11), pp. e3735.
- 1140 Fowler, V. M. (2013) 'The human erythrocyte plasma membrane: a Rosetta Stone for decoding membrane-  
1141 cytoskeleton structure', *Curr Top Membr*, 72, pp. 39-88.
- 1142 Gauthier, N. C., Fardin, M. A., Roca-Cusachs, P. and Sheetz, M. P. (2011) 'Temporary increase in plasma  
1143 membrane tension coordinates the activation of exocytosis and contraction during cell spreading', *Proc*  
1144 *Natl Acad Sci U S A*, 108(35), pp. 14467-72.
- 1145 Gauthier, N. C., Masters, T. A. and Sheetz, M. P. (2012) 'Mechanical feedback between membrane tension  
1146 and dynamics', *Trends Cell Biol*, 22(10), pp. 527-35.
- 1147 Gauthier, N. C., Rossier, O. M., Mathur, A., Hone, J. C. and Sheetz, M. P. (2009) 'Plasma membrane area  
1148 increases with spread area by exocytosis of a GPI-anchored protein compartment', *Mol Biol Cell*, 20(14), pp.  
1149 3261-72.
- 1150 Giannone, G., Dubin-Thaler, B. J., Rossier, O., Cai, Y., Chaga, O., Jiang, G., Beaver, W., Dobereiner, H. G.,  
1151 Freund, Y., Borisy, G. and Sheetz, M. P. (2007) 'Lamellipodial actin mechanically links myosin activity with  
1152 adhesion-site formation', *Cell*, 128(3), pp. 561-75.
- 1153 Hauser, M., Yan, R., Li, W., Repina, N. A., Schaffer, D. V. and Xu, K. (2018) 'The Spectrin-Actin-Based Periodic  
1154 Cytoskeleton as a Conserved Nanoscale Scaffold and Ruler of the Neural Stem Cell Lineage', *Cell Reports*,  
1155 24(6), pp. 1512-1522.
- 1156 Hu, S., Grobe, H., Guo, Z., Wang, Y. H., Doss, B. L., Pan, M., Ladoux, B., Bershadsky, A. D. and Zaidel-Bar, R.  
1157 (2019) 'Reciprocal regulation of actomyosin organization and contractility in nonmuscle cells by  
1158 tropomyosins and alpha-actinins', *Mol Biol Cell*, 30(16), pp. 2025-2036.

- 1159 Iskratsch, T., Wolfenson, H. and Sheetz, M. P. (2014) 'Appreciating force and shape [mdash] the rise of  
1160 mechanotransduction in cell biology', *Nature Reviews Molecular Cell Biology*, 15, pp. 825-833.
- 1161 Jenkins, P. M., He, M. and Bennett, V. (2015) 'Dynamic spectrin/ankyrin-G microdomains promote lateral  
1162 membrane assembly by opposing endocytosis'.
- 1163 Kaksonen, M. and Roux, A. (2018) 'Mechanisms of clathrin-mediated endocytosis', *Nat Rev Mol Cell Biol*,  
1164 19(5), pp. 313-326.
- 1165 Kalappurakkal, J. M., Anilkumar, A. A., Patra, C., van Zanten, T. S., Sheetz, M. P. and Mayor, S. (2019)  
1166 'Integrin Mechano-chemical Signaling Generates Plasma Membrane Nanodomains that Promote Cell  
1167 Spreading', *Cell*, 177(7), pp. 1738-1756.e23.
- 1168 Kirchhausen, T. (2009) 'Imaging endocytic clathrin structures in living cells', *Trends Cell Biol*, 19(11), pp. 596-  
1169 605.
- 1170 Koenderink, G. H. and Paluch, E. K. (2018) 'Architecture shapes contractility in actomyosin networks', *Curr*  
1171 *Opin Cell Biol*, 50, pp. 79-85.
- 1172 Kosmalska, A. J., Casares, L., Elosegui-Artola, A., Thottacherry, J. J., Moreno-Vicente, R., Gonzalez-Tarrago,  
1173 V., del Pozo, M. A., Mayor, S., Arroyo, M., Navajas, D., Trepatt, X., Gauthier, N. C. and Roca-Cusachs, P.  
1174 (2015) 'Physical principles of membrane remodelling during cell mechanoadaptation', *Nat Commun*, 6, pp.  
1175 7292.
- 1176 Krieg, M., Dunn, A. R. and Goodman, M. B. (2014) 'Mechanical control of the sense of touch by beta-  
1177 spectrin', *Nat Cell Biol*, 16(3), pp. 224-33.
- 1178 Krieg, M., Stuhmer, J., Cueva, J. G., Fetter, R., Spilker, K., Cremers, D., Shen, K., Dunn, A. R. and Goodman,  
1179 M. B. (2017) 'Genetic defects in beta-spectrin and tau sensitize *C. elegans* axons to movement-induced  
1180 damage via torque-tension coupling', *Elife*, 6.
- 1181 Kusumi, A., Fujiwara, T. K., Chadda, R., Xie, M., Tsunoyama, T. A., Kalay, Z., Kasai, R. S. and Suzuki, K. G.  
1182 (2012) 'Dynamic organizing principles of the plasma membrane that regulate signal transduction:  
1183 commemorating the fortieth anniversary of Singer and Nicolson's fluid-mosaic model', *Annu Rev Cell Dev*  
1184 *Biol*, 28, pp. 215-50.
- 1185 Lardennois, A., Pásti, G., Ferraro, T., Llense, F., Mahou, P., Pontabry, J., Rodriguez, D., Kim, S., Ono, S.,  
1186 Beaurepaire, E., Gally, C. and Labouesse, M. (2019) 'Publisher Correction: An actin-based viscoplastic lock  
1187 ensures progressive body-axis elongation', *Nature*, pp. 1-1.
- 1188 Law, R., Carl, P., Harper, S., Dalhaimer, P., Speicher, D. W. and Discher, D. E. (2003) 'Cooperativity in Forced  
1189 Unfolding of Tandem Spectrin Repeats', *Biophys J*, 84(1), pp. 533-44.
- 1190 Lecomte, M.C. (2012) 'Spectrins in Human Diseases', *Cytoskeleton and human disease*, pp 345-374.
- 1191 Li, X., Matsuoka, Y. and Bennett, V. (1998) 'Adducin Preferentially Recruits Spectrin to the Fast Growing  
1192 Ends of Actin Filaments in a Complex Requiring the MARCKS-related Domain and a Newly Defined  
1193 Oligomerization Domain'.
- 1194 Liu, S. C., Derick, L. H. and Palek, J. (1987) 'Visualization of the hexagonal lattice in the erythrocyte  
1195 membrane skeleton', *J Cell Biol*, 104(3), pp. 527-36.
- 1196 Machnicka, B., Czogalla, A., Hryniewicz-Jankowska, A., Bogusławska, D. M., Grochowalska, R., Heger, E. and  
1197 Sikorski, A. F. (2014) 'Spectrins: A structural platform for stabilization and activation of membrane channels,  
1198 receptors and transporters', *Biochimica et Biophysica Acta (BBA) - Biomembranes*, 1838(2), pp. 620-634.
- 1199 Machnicka, B., Grochowalska, R., Bogusławska, D. M., Sikorski, A. F. and Lecomte, M. C. (2012) 'Spectrin-  
1200 based skeleton as an actor in cell signaling', *Cell Mol Life Sci*, 69(2), pp. 191-201.
- 1201 Mikulich, A., Kavaliauskiene, S. and Juzenas, P. (2012) 'Blebbistatin, a myosin inhibitor, is phototoxic to  
1202 human cancer cells under exposure to blue light', *Biochim Biophys Acta*, 1820(7), pp. 870-7.
- 1203 Mueller, J., Szep, G., Nemethova, M., de Vries, I., Lieber, A. D., Winkler, C., Kruse, K., Small, J. V., Schmeiser,  
1204 C., Keren, K., Hauschild, R. and Sixt, M. (2017) 'Load Adaptation of Lamellipodial Actin Networks', *Cell*,  
1205 171(1), pp. 188-200 e16.
- 1206 Mund, M., van der Beek, J. A., Deschamps, J., Dmitrieff, S., Hoess, P., Monster, J. L., Picco, A., Nedelec, F.,  
1207 Kaksonen, M. and Ries, J. (2018) 'Systematic Nanoscale Analysis of Endocytosis Links Efficient Vesicle  
1208 Formation to Patterned Actin Nucleation', *Cell*, 174(4), pp. 884-896.e17.
- 1209 Nicolson, G. L. (2014) 'The Fluid-Mosaic Model of Membrane Structure: still relevant to understanding the  
1210 structure, function and dynamics of biological membranes after more than 40 years', *Biochim Biophys Acta*,  
1211 1838(6), pp. 1451-66.

- 1212 Pan, L., Yan, R., Li, W. and Xu, K. (2018) 'Super-Resolution Microscopy Reveals the Native Ultrastructure of  
1213 the Erythrocyte Cytoskeleton', *Cell Rep*, 22(5), pp. 1151-1158.
- 1214 Picart, C. and Discher, D. E. (1999) 'Actin Protofilament Orientation at the Erythrocyte Membrane',  
1215 *Biophysical Journal*, 77(2), pp. 865-878.
- 1216 Pontes, B., Monzo, P., Gole, L., Le Roux, A. L., Kosmalska, A. J., Tam, Z. Y., Luo, W., Kan, S., Viasnoff, V.,  
1217 Roca-Cusachs, P., Tucker-Kellogg, L. and Gauthier, N. C. (2017) 'Membrane tension controls adhesion  
1218 positioning at the leading-edge of cells', *J Cell Biol*.
- 1219 Ryan, G. L., Petroccia, H. M., Watanabe, N. and Vavylonis, D. (2012) 'Excitable actin dynamics in  
1220 lamellipodial protrusion and retraction', *Biophys J*, 102(7), pp. 1493-502.
- 1221 Saka, S. K., Honigsmann, A., Eggeling, C., Hell, S. W., Lang, T. and Rizzoli, S. O. (2014) 'Multi-protein  
1222 assemblies underlie the mesoscale organization of the plasma membrane', *Nat Commun*, 5, pp. 4509.
- 1223 Signoretto, E., Honisch, S., Briglia, M., Faggio, C., Castagna, M. and Lang, F. (2016) 'Nocodazole Induced  
1224 Suicidal Death of Human Erythrocytes', *Cell Physiol Biochem*, 38(1), pp. 379-92.
- 1225 Smith, A. S., Nowak, R. B., Zhou, S., Giannetto, M., Gokhin, D. S., Papoin, J., Ghiran, I. C., Blanc, L., Wan, J.  
1226 and Fowler, V. M. (2018) 'Myosin IIA interacts with the spectrin-actin membrane skeleton to control red  
1227 blood cell membrane curvature and deformability'.
- 1228 Stankewich, M. C., Cianci, C. D., Stabach, P. R., Ji, L., Nath, A. and Morrow, J. S. (2011) 'Cell organization,  
1229 growth, and neural and cardiac development require  $\alpha$ II-spectrin'.
- 1230 Tang, Y., Katuri, V., Dillner, A., Mishra, B., Deng, C. X. and Mishra, L. (2003) 'Disruption of transforming  
1231 growth factor-beta signaling in ELF beta-spectrin-deficient mice', *Science*, 299(5606), pp. 574-7.
- 1232 Thul, P. J., Akesson, L., Wiking, M., Mahdessian, D., Geladaki, A., Ait Blal, H., Alm, T., Asplund, A., Bjork, L.,  
1233 Breckels, L. M., Backstrom, A., Danielsson, F., Fagerberg, L., Fall, J., Gatto, L., Gnann, C., Hober, S., Hjelmare,  
1234 M., Johansson, F., Lee, S., Lindskog, C., Mulder, J., Mulvey, C. M., Nilsson, P., Oksvold, P., Rockberg, J.,  
1235 Schutten, R., Schwenk, J. M., Sivertsson, A., Sjostedt, E., Skogs, M., Stadler, C., Sullivan, D. P., Tegel, H.,  
1236 Winsnes, C., Zhang, C., Zwahlen, M., Mardinoglu, A., Ponten, F., von Feilitzen, K., Lilley, K. S., Uhlen, M. and  
1237 Lundberg, E. (2017) 'A subcellular map of the human proteome', *Science*, 356(6340).
- 1238 Ursitti, J. A. and Fowler, V. M. (1994) 'Immunolocalization of tropomodulin, tropomyosin and actin in  
1239 spread human erythrocyte skeletons', *J Cell Sci*, 107 ( Pt 6), pp. 1633-9.
- 1240 Xu, K., Zhong, G. and Zhuang, X. (2013) 'Actin, spectrin, and associated proteins form a periodic cytoskeletal  
1241 structure in axons', *Science*, 339(6118), pp. 452-6.

1242
